# Supplementary material
Source: PubMed Central journal article supplement (PMC2799822)
Supplement: 0912396106_ST1_PDF.pdf [file 0912396106_ST1_PDF.pdf]

**Table S1.** Starch synthesis related genes in rice

| Classification |                                               | cDNA Acc. NO.   |                                                                                          | BAC or Scaffold Acc. NO.         |               | Chromosome |
|----------------|-----------------------------------------------|-----------------|------------------------------------------------------------------------------------------|----------------------------------|---------------|------------|
|                |                                               |                 |                                                                                          | <i>japonica</i>                  | <i>indica</i> |            |
| AGPase         | Large subunit<br>( <i>AGPlar</i> )            | <b>D50317*</b>  | AK100910                                                                                 | AC120988                         | AAAA01004522  | Chr. 5     |
|                | Large subunit isoform<br>( <i>AGPiso</i> )    | <b>AY028314</b> | AK071497                                                                                 | AP004317<br>AP003688             | AAAA01003476  | Chr. 1     |
|                | small subunit<br>( <i>AGP<sub>sma</sub></i> ) | <b>AY028315</b> | AK060270<br>AK073146                                                                     | AP004756<br>AP004011             | AAAA01000836  | Chr. 9     |
| SS             | GBSS GBSSI ( <i>W<sub>x</sub></i> )           | <b>X53694</b>   | AF515480                                                                                 | AP002542                         | AAAA01010252  | Chr. 6     |
|                |                                               |                 | AF515481 AF515482<br>AF515483 AF031162<br>AF141954 AF141955<br>X65183 AB066093<br>X62134 |                                  |               |            |
|                |                                               |                 |                                                                                          | AL607102                         |               |            |
|                | GBSSII<br>( <i>GBSSII</i> )                   | <b>AF109395</b> | AY069940                                                                                 | AP005325<br>AP003889             | AAAA01001091  | Chr. 7     |
|                | SSS SSI( <i>SSI</i> )                         | <b>AY299404</b> | D38221<br>AF165890 D16202 E06904<br>NM_185620                                            | AB026295                         | AAAA01000263  | Chr. 6     |
|                | SSII <i>SSII-1</i>                            | <b>AF383878</b> | NM_196673                                                                                | AC087550<br>AC087547<br>AE017098 | AAAA01005292  | Chr.10     |
|                | <i>SSII-2</i>                                 | <b>AF395537</b> | AJ308110                                                                                 | AP005297<br>AP004114             | AAAA01001861  | Chr. 2     |

|     |                            |                |                                                     |                      |              |        |
|-----|----------------------------|----------------|-----------------------------------------------------|----------------------|--------------|--------|
|     |                            | <i>SSII-3</i>  | <b>AY423717</b> AF419099                            | AP003509             | AAAA01002444 | Chr. 6 |
|     |                            |                |                                                     |                      | AAAA01011906 |        |
|     | SSIII                      | <i>SSIII-1</i> | <b>AF432915</b>                                     | AL606645             | AAAA01000521 | Chr. 4 |
|     |                            | <i>SSIII-2</i> | <b>AY100469</b>                                     | AP005441             | AAAA01000600 | Chr. 8 |
|     |                            |                |                                                     | AP004660             |              |        |
|     | SSIV                       | <i>SSIV-1</i>  | <b>AY373257</b> AY100470                            | AP003292             | AAAA01000144 | Chr. 1 |
|     |                            | <i>SSIV-2</i>  | <b>AY373258</b> AY100471                            | AC121365             | AAAA01002233 | Chr. 5 |
| SBE | SBE1( <i>Sbe1</i> )        |                | <b>D10838</b> AF136268<br>AY302112 D10752<br>E07175 | AP003685<br>AP004685 | AAAA01002467 | Chr. 6 |
|     | SBE3 ( <i>Sbe3</i> )       |                | <b>D16201</b> E08183                                | AP004879             | AAAA01009319 | Chr. 2 |
|     |                            |                |                                                     | AP004777             | AAAA01010110 |        |
|     |                            |                |                                                     | AP004790             |              |        |
|     | SBE4 ( <i>Sbe4</i> )       |                | <b>AB023498</b> E14723                              | AL731641             | AAAA02013735 | Chr. 4 |
| DBE | Isoamylase( <i>ISA</i> )   |                | <b>AB093426</b> AB015615                            | AP005509             | AAAA01000810 | Chr. 8 |
|     | Pullulanase ( <i>PUL</i> ) |                | <b>D50602</b> AB012915                              | AL662959             | AAAA01001658 | Chr. 4 |

---

\* Letters marked in bold imply the cDNA used as bait in search for genome sequence by Blastn
