# Supplementary material
Source: PubMed Central journal article supplement (PMC2799822)
Supplement: 0912396106_ST2_PDF.pdf [file 0912396106_ST2_PDF.pdf]

**Table S2.** Nucleotide diversities of starch synthesis related genes in rice

| Genes          | Whole gene |                       |                     |         | CDS       |                       |                     |         |           |
|----------------|------------|-----------------------|---------------------|---------|-----------|-----------------------|---------------------|---------|-----------|
|                | No. of bp  | Sites polymorphic (%) | Diversity ( $\pi$ ) |         | No. of bp | Sites polymorphic (%) | Diversity ( $\pi$ ) |         |           |
|                |            |                       | All                 | Indels  |           |                       | All                 | Synon.  | NonSynon. |
| <i>AGPlar</i>  | 5617       | 0.35606               | 0.0011              | 0.00039 | 1560      | 0.00000               | 0.00000             | 0.00000 | 0.00000   |
| <i>AGPiso</i>  | 6342       | 0.34744               | 0.00103             | 0.0001  | 1557      | 0.06423               | 0.00032             | 0.00142 | 0.00000   |
| <i>AGPsmA</i>  | 6142       | 1.07457               | 0.00372             | 0.00053 | 1509      | 0.33135               | 0.00176             | 0.00295 | 0.00139   |
| <i>Wx</i>      | 6208       | 1.22423               | 0.00441             | 0.00082 | 1853      | 0.10793               | 0.00047             | 0.00080 | 0.00035   |
| <i>GBSSII</i>  | 6309       | 1.36313               | 0.00517             | 0.00129 | 1827      | 0.87575               | 0.00384             | 0.00247 | 0.00427   |
| <i>SSI</i>     | 10218      | 1.29184               | 0.00452             | 0.00099 | 1926      | 0.57113               | 0.00221             | 0.00666 | 0.00077   |
| <i>SSII-1</i>  | 10704      | 0.84081               | 0.00327             | 0.00062 | 2250      | 0.35556               | 0.00156             | 0.00284 | 0.00116   |
| <i>SSII-2</i>  | 7012       | 0.67028               | 0.0026              | 0.00049 | 2085      | 0.38369               | 0.00182             | 0.00309 | 0.00142   |
| <i>SSII-3</i>  | 7711       | 1.02451               | 0.00322             | 0.00063 | 2433      | 0.41102               | 0.00135             | 0.00259 | 0.00093   |
| <i>SSIII-1</i> | 9030       | 0.83056               | 0.00222             | 0.00076 | 3651      | 0.49302               | 0.00189             | 0.00374 | 0.00137   |
| <i>SSIII-2</i> | 11631      | 1.28966               | 0.00398             | 0.0005  | 4662      | 0.64350               | 0.00224             | 0.00417 | 0.00170   |
| <i>SSIV-1</i>  | 10684      | 0.66455               | 0.00245             | 0.00043 | 2889      | 0.17307               | 0.00071             | 0.00101 | 0.00063   |
| <i>SSIV-2</i>  | 7923       | 0.49224               | 0.00163             | 0.00041 | 2760      | 0.21739               | 0.00085             | 0.00355 | 0.00006   |
| <i>SBE1</i>    | 9758       | 0.35868               | 0.00117             | 0.00052 | 2463      | 0.08120               | 0.00041             | 0.00181 | 0.00000   |
| <i>SBE3</i>    | 14631      | 0.53995               | 0.00163             | 0.00057 | 2478      | 0.24213               | 0.00106             | 0.00282 | 0.00053   |
| <i>SBE4</i>    | 12710      | 0.60582               | 0.00244             | 0.00052 | 2529      | 0.00000               | 0.00000             | 0.00000 | 0.00000   |
| <i>ISA</i>     | 9484       | 0.51666               | 0.00181             | 0.00079 | 2436      | 0.12315               | 0.00048             | 0.00114 | 0.00028   |
| <i>PUL</i>     | 14452      | 3.48741               | 0.01452             | 0.0028  | 2940      | 1.36054               | 0.00685             | 0.01997 | 0.00291   |

Note: Whole gene diversity analysis was used **TASSEL** software, CDS diversity analysis was used **dnasp 4** software
