# Supplementary material
Source: PubMed Central journal article supplement (PMC2799822)
Supplement: 0912396106_ST3_PDF.pdf [file 0912396106_ST3_PDF.pdf]

**Table S3.** Polymorphic sites of the starch synthesis related genes in different varieties**Continual-1**

| Varieties       | Subspecies      | <i>AGP<sub>sma</sub></i> |         |         |         | <i>AGP<sub>lar</sub></i> |         |         | <i>AGP<sub>iso</sub></i> |        |        |
|-----------------|-----------------|--------------------------|---------|---------|---------|--------------------------|---------|---------|--------------------------|--------|--------|
|                 |                 | As-1886                  | As-1858 | As-1855 | As-1845 | Al-1633                  | Al-1566 | Al-1561 | Ai-511                   | Ai-455 | Ai-454 |
| Ce64-7          | <i>indica</i>   | G                        | G       | A       | T       | T                        | ----    | TCT     | C                        | G      | T      |
| Gui99           | <i>indica</i>   | A                        | G       | A       | C       | T                        | ----    | TCT     | C                        | G      | T      |
| C bao           | <i>japonica</i> | A                        | G       | A       | C       | T                        | CTCCT   | TCT     | C                        | G      | T      |
| Nipponbare      | <i>japonica</i> | G                        | G       | T       | C       | T                        | CTCCT   | TCT     | T                        | A      | C      |
| 93-11           | <i>indica</i>   | A                        | G       | A       | C       | T                        | ----    | TCT     | T                        | A      | C      |
| Minghui63       | <i>indica</i>   | A                        | G       | A       | C       | T                        | ----    | TCT     | C                        | G      | T      |
| Xiushui11       | <i>japonica</i> | G                        | C       | A       | C       | T                        | CTCCT   | TCT     | T                        | A      | C      |
| Xiushui04       | <i>japonica</i> | G                        | G       | T       | C       | T                        | CTCCT   | TCT     | T                        | A      | C      |
| Yongyou1        | <i>japonica</i> | G                        | G       | T       | C       | T                        | CTCCT   | TCT     | T                        | A      | C      |
| Changyou94      | <i>japonica</i> | G                        | G       | T       | C       | T                        | CTCCT   | TCT     | T                        | A      | C      |
| Yongjing04      | <i>japonica</i> | G                        | G       | T       | C       | T                        | CTCCT   | TCT     | T                        | A      | C      |
| Xiushui63       | <i>japonica</i> | G                        | C       | A       | C       | T                        | CTCCT   | TCT     | T                        | A      | C      |
| Sengkeu         | <i>japonica</i> | G                        | G       | T       | C       | T                        | CTCCT   | TCT     | T                        | A      | C      |
| Chunjiang06     | <i>japonica</i> | G                        | G       | T       | C       | T                        | CTCCT   | TCT     | T                        | A      | C      |
| Wuyunjing7      | <i>japonica</i> | G                        | G       | T       | C       | T                        | CTCCT   | TCT     | T                        | A      | C      |
| Zhongchao123    | <i>japonica</i> | G                        | G       | T       | C       | T                        | CTCCT   | TCT     | T                        | A      | C      |
| Teqing          | <i>indica</i>   | A                        | G       | A       | C       | T                        | CTCCT   | TCT     | C                        | G      | T      |
| Zhong9B         | <i>indica</i>   | A                        | G       | A       | C       | T                        | ----    | TCT     | C                        | G      | T      |
| Liantangzao     | <i>indica</i>   | A                        | G       | A       | C       | C                        | ----    | ---     | C                        | G      | T      |
| Lunhui422       | <i>japonica</i> | A                        | G       | A       | C       | T                        | ----    | TCT     | C                        | G      | T      |
| 9308            | <i>indica</i>   | G                        | G       | T       | C       | T                        | CTCCT   | TCT     | C                        | G      | T      |
| TaichungNative1 | <i>indica</i>   | G                        | G       | A       | T       | C                        | ----    | ---     | C                        | G      | T      |
| 2070            | <i>indica</i>   | A                        | G       | A       | C       | T                        | ----    | TCT     | C                        | G      | T      |
| 02428           | <i>japonica</i> | A                        | G       | A       | C       | T                        | CTCCT   | TCT     | C                        | G      | T      |

|                   |                 |   |   |   |   |   |       |     |   |   |   |
|-------------------|-----------------|---|---|---|---|---|-------|-----|---|---|---|
| Ji 86-11          | <i>japonica</i> | G | G | T | C | T | CTCCT | TCT | T | A | C |
| Zhaiyeqing8       | <i>indica</i>   | G | G | A | T | T | ----  | TCT | C | G | T |
| LongtefuB         | <i>indica</i>   | A | G | A | C | T | ----  | TCT | C | A | T |
| 98110             | <i>japonica</i> | G | G | T | C | T | CTCCT | TCT | T | A | C |
| Nanjing6          | <i>indica</i>   | A | G | A | C | C | ----  | --- | C | A | T |
| Miyang46          | <i>indica</i>   | A | G | A | C | T | CTCCT | TCT | C | G | T |
| Zhefu802          | <i>indica</i>   | A | G | A | C | C | ----  | --- | C | G | T |
| Guangluai4        | <i>indica</i>   | A | G | A | C | C | ----  | --- | C | G | T |
| IAPAR9            | <i>japonica</i> | G | G | T | C | T | CTCCT | TCT | T | A | C |
| Zhonghan3         | <i>japonica</i> | G | G | T | C | T | CTCCT | TCT | T | A | C |
| Kinmaze           | <i>japonica</i> | G | G | T | C | T | CTCCT | TCT | T | A | C |
| Zhongxiangnuo     | <i>indica</i>   | A | G | A | C | C | ----  | --- | C | G | T |
| Guixiangsinuo     | <i>indica</i>   | A | G | A | C | T | CTCCT | TCT | C | G | T |
| Nanfengnuo        | <i>indica</i>   | A | G | A | C | C | ----  | --- | C | G | T |
| Qiufengnuo        | <i>japonica</i> | G | G | T | C | T | CTCCT | TCT | T | A | C |
| Shaonuo           | <i>japonica</i> | G | G | T | C | T | CTCCT | TCT | T | A | C |
| Suyunuo           | <i>japonica</i> | G | C | A | C | T | CTCCT | TCT | C | A | C |
| Guanglingxiangnuo | <i>japonica</i> | A | G | A | C | T | CTCCT | TCT | T | A | C |
| Taichungsen46     | <i>japonica</i> | G | G | A | T | T | CTCCT | TCT | T | A | C |
| Zhendao5125       | <i>japonica</i> | G | G | T | C | T | ----  | TCT | C | A | C |
| Nongken58         | <i>japonica</i> | G | G | T | C | T | CTCCT | TCT | T | A | C |
| Kasalath          | <i>indica</i>   | G | G | T | C | T | ----  | TCT | T | A | C |
| Juanguang         | <i>japonica</i> | G | G | T | C | T | CTCCT | TCT | T | A | C |
| Koshihikari       | <i>japonica</i> | G | G | T | C | T | CTCCT | TCT | T | A | C |
| Huangjinqing      | <i>japonica</i> | G | G | T | C | T | CTCCT | TCT | T | A | C |
| Yangguang         | <i>japonica</i> | G | G | T | C | T | CTCCT | TCT | C | A | C |
| Taiwannuo         | <i>indica</i>   | A | G | A | C | T | ----  | TCT | C | G | T |
| Zhenshan97B       | <i>indica</i>   | A | G | A | C | C | ----  | --- | C | G | T |

|                   |                 |   |   |   |   |   |       |     |   |   |   |
|-------------------|-----------------|---|---|---|---|---|-------|-----|---|---|---|
| XieqingzaoB       | <i>indica</i>   | G | G | A | T | C | ----  | --- | C | G | T |
| Gang46B           | <i>indica</i>   | A | G | A | C | C | ----  | --- | C | G | T |
| Chunjiang025      | <i>japonica</i> | G | G | T | C | T | CTCCT | TCT | T | A | C |
| Guichao2#         | <i>indica</i>   | A | G | A | C | C | ----  | --- | C | G | T |
| Taihunuo          | <i>japonica</i> | G | G | T | C | T | CTCCT | TCT | T | A | C |
| Jiangzhouxiangnuo | <i>japonica</i> | G | G | T | C | T | CTCCT | TCT | T | A | C |
| Zhongjian 100     | <i>indica</i>   | A | G | A | C | C | ----  | --- | C | G | T |
| Jingxi17          | <i>japonica</i> | G | G | T | C | T | CTCCT | TCT | T | A | C |
| C418              | <i>japonica</i> | G | G | T | C | C | ----  | --- | T | A | C |
| IR36              | <i>indica</i>   | A | G | A | C | T | ----  | TCT | C | G | T |
| IR64              | <i>indica</i>   | A | G | A | C | T | ----  | TCT | C | G | T |
| IR24              | <i>indica</i>   | A | G | A | C | C | ----  | --- | C | G | T |
| IRBB5             | <i>indica</i>   | A | G | A | C | T | CTCCT | TCT | T | A | C |
| IRBB13            | <i>indica</i>   | A | G | A | C | T | ----  | TCT | C | G | T |
| IRBB50            | <i>indica</i>   | A | G | A | C | T | CTCCT | TCT | T | A | C |
| Xiushui110        | <i>japonica</i> | G | G | T | C | T | CTCCT | TCT | T | A | C |
| Jiazao935         | <i>indica</i>   | A | G | A | C | T | ----  | TCT | C | G | T |
| Jiahua1           | <i>japonica</i> | G | G | T | C | T | CTCCT | TCT | T | A | C |

**Continual-2**

| Varieties       | Subspecies      | Wx      |                         | GBSSII      |             | SBEI     |
|-----------------|-----------------|---------|-------------------------|-------------|-------------|----------|
|                 |                 | Wx-1160 | Wx+111                  | GBSSII-1623 | GBSSII-1564 | SBE1-859 |
| Ce64-7          | <i>indica</i>   | T       | ACGGGTTCCAGGGCCTCAAGCCC | A           | G           | 311Del   |
| Gui99           | <i>indica</i>   | T       | -----                   | A           | G           | 311Del   |
| C bao           | <i>japonica</i> | T       | -----                   | A           | G           | 311Del   |
| Nipponbare      | <i>japonica</i> | T       | -----                   | T           | A           | 311In    |
| 93-11           | <i>indica</i>   | T       | -----                   | A           | G           | 311Del   |
| Minghui63       | <i>indica</i>   | T       | -----                   | A           | G           | 311Del   |
| Xiushui11       | <i>japonica</i> | T       | -----                   | T           | A           | 311In    |
| Xiushui04       | <i>japonica</i> | T       | -----                   | A           | G           | 311In    |
| Yongyou1        | <i>japonica</i> | T       | -----                   | T           | A           | 311In    |
| Changyou94      | <i>japonica</i> | T       | -----                   | T           | A           | 311In    |
| Yongjing04      | <i>japonica</i> | T       | -----                   | T           | A           | 311In    |
| Xiushui63       | <i>japonica</i> | T       | -----                   | T           | A           | 311In    |
| Sengkeu         | <i>japonica</i> | T       | -----                   | T           | A           | 311In    |
| Chunjiang06     | <i>japonica</i> | T       | -----                   | A           | G           | 311In    |
| Wuyunjing7      | <i>japonica</i> | T       | -----                   | T           | A           | 311In    |
| Zhongchao123    | <i>japonica</i> | T       | -----                   | T           | A           | 311In    |
| Teqing          | <i>indica</i>   | G       | -----                   | T           | G           | 311Del   |
| Zhong9B         | <i>indica</i>   | G       | -----                   | A           | G           | 311Del   |
| Liantangzao     | <i>indica</i>   | G       | -----                   | A           | G           | 311Del   |
| Lunhui422       | <i>japonica</i> | T       | -----                   | A           | G           | 311Del   |
| 9308            | <i>indica</i>   | T       | -----                   | T           | G           | 311Del   |
| TaichungNative1 | <i>indica</i>   | G       | -----                   | A           | G           | 311Del   |
| 2070            | <i>indica</i>   | T       | -----                   | A           | G           | 311Del   |
| 02428           | <i>japonica</i> | T       | -----                   | T           | A           | 311Del   |
| Ji 86-11        | <i>japonica</i> | T       | -----                   | T           | A           | 311Del   |

|                   |                 |   |                         |   |   |        |
|-------------------|-----------------|---|-------------------------|---|---|--------|
| Zhaiyeqing8       | <i>indica</i>   | G | -----                   | T | G | 311Del |
| LongtefuB         | <i>indica</i>   | G | -----                   | A | G | 311Del |
| 98110             | <i>japonica</i> | T | -----                   | T | A | 311In  |
| Nanjing6          | <i>indica</i>   | G | -----                   | T | G | 311Del |
| Miyang46          | <i>indica</i>   | T | -----                   | A | G | 311Del |
| Zhefu802          | <i>indica</i>   | G | -----                   | A | G | 311Del |
| Guangluai4        | <i>indica</i>   | G | -----                   | A | G | 311Del |
| IAPAR9            | <i>japonica</i> | G | -----                   | T | A | 311Del |
| Zhonghan3         | <i>japonica</i> | G | -----                   | T | A | 311Del |
| Kinmaze           | <i>japonica</i> | T | -----                   | T | A | 311In  |
| Zhongxiangnuo     | <i>indica</i>   | T | ACGGGTTCCAGGGCCTCAAGCCC | A | G | 311Del |
| Guixiangsinuo     | <i>indica</i>   | T | ACGGGTTCCAGGGCCTCAAGCCC | T | G | 311Del |
| Nanfengnuo        | <i>indica</i>   | T | ACGGGTTCCAGGGCCTCAAGCCC | T | G | 311Del |
| Qiufengnuo        | <i>japonica</i> | T | ACGGGTTCCAGGGCCTCAAGCCC | A | G | 311In  |
| Shaonuo           | <i>japonica</i> | T | ACGGGTTCCAGGGCCTCAAGCCC | T | A | 311Del |
| Suyunuo           | <i>japonica</i> | T | ACGGGTTCCAGGGCCTCAAGCCC | T | A | 311In  |
| Guanglingxiangnuo | <i>japonica</i> | T | ACGGGTTCCAGGGCCTCAAGCCC | T | A | 311In  |
| Taichungsen46     | <i>japonica</i> | T | ACGGGTTCCAGGGCCTCAAGCCC | T | A | 311In  |
| Zhendao5125       | <i>japonica</i> | T | ACGGGTTCCAGGGCCTCAAGCCC | T | A | 311Del |
| Nongken58         | <i>japonica</i> | T | -----                   | T | A | 311In  |
| Kasalath          | <i>indica</i>   | G | -----                   | A | G | 311Del |
| Juanguang         | <i>japonica</i> | T | -----                   | T | A | 311In  |
| Koshihikari       | <i>japonica</i> | T | -----                   | T | A | 311In  |
| Huangjinqing      | <i>japonica</i> | T | -----                   | T | A | 311In  |
| Yangguang         | <i>japonica</i> | T | -----                   | T | A | 311In  |
| Taiwannuo         | <i>indica</i>   | T | ACGGGTTCCAGGGCCTCAAGCCC | A | G | 311Del |
| Zhenshan97B       | <i>indica</i>   | G | -----                   | A | G | 311Del |
| XieqingzaoB       | <i>indica</i>   | G | -----                   | A | G | 311Del |

|                   |                 |   |                         |   |   |        |
|-------------------|-----------------|---|-------------------------|---|---|--------|
| Gang46B           | <i>indica</i>   | G | -----                   | A | G | 311Del |
| Chunjiang025      | <i>japonica</i> | T | -----                   | T | A | 311In  |
| Guichao2#         | <i>indica</i>   | G | -----                   | T | G | 311Del |
| Taihunuo          | <i>japonica</i> | T | ACGGGTTCCAGGGCCTCAAGCCC | T | A | 311In  |
| Jiangzhouxiangnuo | <i>japonica</i> | T | ACGGGTTCCAGGGCCTCAAGCCC | T | A | 311In  |
| Zhongjian 100     | <i>indica</i>   | T | -----                   | A | G | 311Del |
| Jingxi17          | <i>japonica</i> | T | -----                   | T | A | 311In  |
| C418              | <i>japonica</i> | T | -----                   | A | G | 311Del |
| IR36              | <i>indica</i>   | G | -----                   | A | G | 311Del |
| IR64              | <i>indica</i>   | G | -----                   | A | G | 311Del |
| IR24              | <i>indica</i>   | T | -----                   | A | G | 311Del |
| IRBB5             | <i>indica</i>   | T | -----                   | A | G | 311Del |
| IRBB13            | <i>indica</i>   | T | -----                   | A | G | 311Del |
| IRBB50            | <i>indica</i>   | T | -----                   | A | G | 311Del |
| Xiushui110        | <i>japonica</i> | T | -----                   | T | A | 311In  |
| Jiazao935         | <i>indica</i>   | T | -----                   | A | G | 311Del |
| Jiahua1           | <i>japonica</i> | T | -----                   | T | A | 311In  |

### Continual-3

| Varieties  | Subspecies      | SBE3      |                | SBE4      | ISA      |          |          |
|------------|-----------------|-----------|----------------|-----------|----------|----------|----------|
|            |                 | SBE3+3505 | SBE3+3577      | SBE4-1148 | ISA-1625 | ISA-1499 | ISA-1326 |
| Ce64-7     | <i>indica</i>   | A         | AATATATAATATAT | G         | C        | C        | --       |
| Gui99      | <i>indica</i>   | A         | AATATATAATATAT | G         | C        | C        | --       |
| C bao      | <i>japonica</i> | A         | AATATATAATATAT | G         | C        | C        | --       |
| Nipponbare | <i>japonica</i> | G         | AATATAT        | C         | T        | C        | AT       |
| 93-11      | <i>indica</i>   | A         | AATATATAATATAT | G         | C        | C        | --       |

|                 |                 |   |                |   |   |   |    |
|-----------------|-----------------|---|----------------|---|---|---|----|
| Minghui63       | <i>indica</i>   | G | AATATAT        | G | C | C | -- |
| Xiushui11       | <i>japonica</i> | G | AATATAT        | C | T | C | AT |
| Xiushui04       | <i>japonica</i> | G | AATATAT        | C | T | C | AT |
| Yongyou1        | <i>japonica</i> | A | AATATATAATATAT | C | T | C | AT |
| Changyou94      | <i>japonica</i> | G | AATATAT        | C | T | C | AT |
| Yongjing04      | <i>japonica</i> | G | AATATAT        | C | T | C | AT |
| Xiushui63       | <i>japonica</i> | G | AATATAT        | C | T | C | AT |
| Sengkeu         | <i>japonica</i> | G | AATATAT        | C | T | C | AT |
| Chunjiang06     | <i>japonica</i> | G | AATATAT        | C | T | C | AT |
| Wyunjing7       | <i>japonica</i> | G | AATATAT        | C | T | C | AT |
| Zhongchao123    | <i>japonica</i> | A | AATATATAATATAT | C | T | C | AT |
| Teqing          | <i>indica</i>   | A | AATATATAATATAT | G | C | C | -- |
| Zhong9B         | <i>indica</i>   | A | AATATATAATATAT | G | C | C | -- |
| Liantangzao     | <i>indica</i>   | A | AATATATAATATAT | G | C | C | -- |
| Lunhui422       | <i>japonica</i> | A | AATATATAATATAT | G | C | C | -- |
| 9308            | <i>indica</i>   | A | AATATATAATATAT | C | C | C | -- |
| TaichungNative1 | <i>indica</i>   | G | AATATAT        | G | C | C | -- |
| 2070            | <i>indica</i>   | G | AATATAT        | G | C | C | -- |
| 02428           | <i>japonica</i> | A | AATATATAATATAT | C | T | G | AT |
| Ji 86-11        | <i>japonica</i> | G | AATATAT        | C | T | C | AT |
| Zhaiyeqing8     | <i>indica</i>   | A | AATATATAATATAT | G | C | C | -- |
| LongtefuB       | <i>indica</i>   | A | AATATATAATATAT | G | C | C | -- |
| 98110           | <i>japonica</i> | G | AATATAT        | C | T | C | AT |
| Nanjing6        | <i>indica</i>   | A | AATATATAATATAT | G | T | C | -- |
| Miyang46        | <i>indica</i>   | A | AATATATAATATAT | G | C | C | -- |
| Zhefu802        | <i>indica</i>   | A | AATATATAATATAT | G | C | C | -- |
| Guangluai4      | <i>indica</i>   | A | AATATATAATATAT | G | C | C | -- |
| IAPAR9          | <i>japonica</i> | G | AATATAT        | C | T | G | AT |

|                   |                 |   |                |   |   |   |    |
|-------------------|-----------------|---|----------------|---|---|---|----|
| Zhonghan3         | <i>japonica</i> | G | AATATAT        | C | T | G | AT |
| Kinmaze           | <i>japonica</i> | G | AATATAT        | C | T | C | AT |
| Zhongxiangnuo     | <i>indica</i>   | A | AATATATAATATAT | G | C | C | -- |
| Guixiangsinuo     | <i>indica</i>   | A | AATATAT        | G | C | C | -- |
| Nanfengnuo        | <i>indica</i>   | A | AATATAT        | G | C | C | -- |
| Qiufengnuo        | <i>japonica</i> | G | AATATAT        | C | T | G | AT |
| Shaonuo           | <i>japonica</i> | G | AATATAT        | C | T | C | AT |
| Suyunuo           | <i>japonica</i> | G | AATATAT        | C | T | G | AT |
| Guanglingxiangnuo | <i>japonica</i> | G | AATATAT        | C | T | C | AT |
| Taichungsen46     | <i>japonica</i> | G | AATATAT        | C | T | C | AT |
| Zhendao5125       | <i>japonica</i> | G | AATATAT        | C | T | C | AT |
| Nongken58         | <i>japonica</i> | G | AATATAT        | C | T | C | AT |
| Kasalath          | <i>indica</i>   | G | AATATAT        | G | C | C | AT |
| Juanguang         | <i>japonica</i> | G | AATATAT        | C | T | C | AT |
| Koshihikari       | <i>japonica</i> | G | AATATAT        | C | T | C | AT |
| Huangjinqing      | <i>japonica</i> | G | AATATAT        | C | T | C | AT |
| Yangguang         | <i>japonica</i> | G | AATATAT        | C | T | C | AT |
| Taiwannuo         | <i>indica</i>   | G | AATATAT        | G | C | C | -- |
| Zhenshan97B       | <i>indica</i>   | A | AATATATAATATAT | G | C | C | -- |
| XieqingzaoB       | <i>indica</i>   | A | AATATATAATATAT | G | C | C | -- |
| Gang46B           | <i>indica</i>   | A | AATATATAATATAT | G | C | C | -- |
| Chunjiang025      | <i>japonica</i> | G | AATATAT        | C | T | C | AT |
| Guichao2#         | <i>indica</i>   | A | AATATATAATATAT | G | C | C | -- |
| Taihunuo          | <i>japonica</i> | G | AATATAT        | C | T | C | AT |
| Jiangzhouxiangnuo | <i>japonica</i> | G | AATATAT        | C | T | C | AT |
| Zhongjian 100     | <i>indica</i>   | A | AATATATAATATAT | G | C | C | -- |
| Jingxi17          | <i>japonica</i> | G | AATATAT        | C | T | C | AT |
| C418              | <i>japonica</i> | A | AATATATAATATAT | C | C | C | -- |



|            |                 |   |                |   |   |   |    |
|------------|-----------------|---|----------------|---|---|---|----|
| IR36       | <i>indica</i>   | A | AATATATAATATAT | G | C | C | -- |
| IR64       | <i>indica</i>   | A | AATATATAATATAT | G | C | C | -- |
| IR24       | <i>indica</i>   | A | AATATATAATATAT | G | C | C | -- |
| IRBB5      | <i>indica</i>   | A | AATATATAATATAT | G | C | C | -- |
| IRBB13     | <i>indica</i>   | A | AATATATAATATAT | G | C | C | -- |
| IRBB50     | <i>indica</i>   | A | AATATATAATATAT | G | C | C | -- |
| Xiushui110 | <i>japonica</i> | G | AATATAT        | C | T | C | AT |
| Jiazao935  | <i>indica</i>   | A | AATATATAATATAT | G | C | C | -- |
| Jiahua1    | <i>japonica</i> | G | AATATAT        | C | T | C | AT |

---

**Continual-4**

| Varieties       | Subspecies      | PUL     |         |         | SSI      |          | SSII-1      |             |
|-----------------|-----------------|---------|---------|---------|----------|----------|-------------|-------------|
|                 |                 | PUL+855 | PUL+856 | PUL+859 | SSI+3159 | SSI+3216 | SSII-1-1698 | SSII-1-1594 |
| Ce64-7          | <i>indica</i>   | T       | --      | A       | T        | T        | T           | ---         |
| Gui99           | <i>indica</i>   | T       | --      | G       | T        | A        | T           | ---         |
| C bao           | <i>japonica</i> | C       | --      | G       | T        | A        | T           | ---         |
| Nipponbare      | <i>japonica</i> | T       | AC      | G       | T        | A        | G           | CTC         |
| 93-11           | <i>indica</i>   | T       | --      | G       | T        | T        | T           | ---         |
| Minghui63       | <i>indica</i>   | C       | --      | G       | T        | A        | T           | ---         |
| Xiushui11       | <i>japonica</i> | T       | AC      | G       | T        | A        | G           | CTC         |
| Xiushui04       | <i>japonica</i> | T       | AC      | G       | T        | A        | G           | CTC         |
| Yongyou1        | <i>japonica</i> | T       | AC      | G       | T        | A        | G           | CTC         |
| Changyou94      | <i>japonica</i> | T       | AC      | G       | T        | A        | G           | CTC         |
| Yongjing04      | <i>japonica</i> | T       | AC      | G       | T        | A        | G           | CTC         |
| Xiushui63       | <i>japonica</i> | T       | AC      | G       | T        | A        | G           | CTC         |
| Sengkeu         | <i>japonica</i> | T       | AC      | G       | T        | A        | G           | CTC         |
| Chunjiang06     | <i>japonica</i> | T       | AC      | G       | T        | A        | G           | ---         |
| Wuyunjing7      | <i>japonica</i> | T       | AC      | G       | T        | A        | G           | CTC         |
| Zhongchao123    | <i>japonica</i> | T       | AC      | G       | T        | A        | G           | CTC         |
| Teqing          | <i>indica</i>   | T       | --      | G       | T        | T        | T           | ---         |
| Zhong9B         | <i>indica</i>   | T       | --      | A       | A        | A        | T           | ---         |
| Liantangzao     | <i>indica</i>   | T       | --      | A       | T        | T        | T           | ---         |
| Lunhui422       | <i>japonica</i> | T       | --      | G       | T        | T        | T           | ---         |
| 9308            | <i>indica</i>   | T       | AC      | G       | T        | A        | T           | ---         |
| TaichungNative1 | <i>indica</i>   | T       | --      | A       | T        | T        | T           | ---         |
| 2070            | <i>indica</i>   | C       | --      | G       | T        | A        | T           | ---         |
| 02428           | <i>japonica</i> | C       | --      | G       | T        | T        | T           | ---         |
| Ji 86-11        | <i>japonica</i> | T       | AC      | G       | T        | A        | G           | CTC         |

|                   |                 |   |    |   |   |   |   |     |
|-------------------|-----------------|---|----|---|---|---|---|-----|
| Zhaiyeqing8       | <i>indica</i>   | T | AC | G | A | A | T | --- |
| LongtefuB         | <i>indica</i>   | T | -- | G | A | A | T | --- |
| 98110             | <i>japonica</i> | T | AC | G | T | A | G | CTC |
| Nanjing6          | <i>indica</i>   | T | -- | A | T | T | T | --- |
| Miyang46          | <i>indica</i>   | T | -- | G | T | A | T | --- |
| Zhefu802          | <i>indica</i>   | T | -- | A | T | T | T | --- |
| Guangluai4        | <i>indica</i>   | T | -- | A | A | A | T | --- |
| IAPAR9            | <i>japonica</i> | C | -- | G | T | A | G | CTC |
| Zhonghan3         | <i>japonica</i> | C | -- | G | T | A | G | --- |
| Kinmaze           | <i>japonica</i> | T | AC | G | T | A | G | CTC |
| Zhongxiangnuo     | <i>indica</i>   | T | -- | A | A | A | T | --- |
| Guixiangsinuo     | <i>indica</i>   | T | -- | A | A | A | T | --- |
| Nanfengnuo        | <i>indica</i>   | T | -- | G | T | A | T | --- |
| Qiufengnuo        | <i>japonica</i> | T | AC | G | T | A | G | --- |
| Shaonuo           | <i>japonica</i> | T | AC | G | T | A | G | CTC |
| Suyunuo           | <i>japonica</i> | T | AC | G | T | A | G | --- |
| Guanglingxiangnuo | <i>japonica</i> | T | AC | G | T | A | G | CTC |
| Taichungsen46     | <i>japonica</i> | T | AC | G | T | A | G | CTC |
| Zhendao5125       | <i>japonica</i> | T | AC | G | T | A | G | CTC |
| Nongken58         | <i>japonica</i> | T | AC | G | T | A | G | CTC |
| Kasalath          | <i>indica</i>   | C | -- | G | A | A | T | --- |
| Juanguang         | <i>japonica</i> | T | AC | G | T | A | G | CTC |
| Koshihikari       | <i>japonica</i> | T | AC | G | T | A | G | CTC |
| Huangjinjing      | <i>japonica</i> | T | AC | G | T | A | G | CTC |
| Yangguang         | <i>japonica</i> | T | AC | G | T | A | G | CTC |
| Taiwannuo         | <i>indica</i>   | T | -- | A | T | T | T | --- |
| Zhenshan97B       | <i>indica</i>   | T | -- | A | A | A | T | --- |
| XieqingzaoB       | <i>indica</i>   | T | -- | G | A | A | T | --- |

|                   |                 |   |    |   |   |   |   |     |
|-------------------|-----------------|---|----|---|---|---|---|-----|
| Gang46B           | <i>indica</i>   | T | -- | A | A | A | T | --- |
| Chunjiang025      | <i>japonica</i> | T | AC | G | T | A | G | CTC |
| Guichao2#         | <i>indica</i>   | T | -- | G | T | T | T | --- |
| Taihunuo          | <i>japonica</i> | T | AC | G | T | A | G | CTC |
| Jiangzhouxiangnuo | <i>japonica</i> | T | AC | G | T | A | G | CTC |
| Zhongjian 100     | <i>indica</i>   | T | AC | G | T | A | T | --- |
| Jingxi17          | <i>japonica</i> | T | AC | G | T | A | G | CTC |
| C418              | <i>japonica</i> | T | -- | G | T | A | T | --- |
| IR36              | <i>indica</i>   | C | -- | G | A | A | T | --- |
| IR64              | <i>indica</i>   | C | -- | G | T | A | T | --- |
| IR24              | <i>indica</i>   | T | -- | G | T | A | T | --- |
| IRBB5             | <i>indica</i>   | T | -- | G | T | A | T | --- |
| IRBB13            | <i>indica</i>   | T | -- | G | T | A | T | --- |
| IRBB50            | <i>indica</i>   | T | -- | G | T | A | T | --- |
| Xiushui110        | <i>japonica</i> | T | AC | G | T | A | G | CTC |
| Jiazao935         | <i>indica</i>   | T | -- | G | T | A | T | --- |
| Jiahua1           | <i>japonica</i> | T | AC | G | T | A | G | CTC |

---

**Continual-5**

| Varieties       | Subspecies      | SSII-2      |                   | SSII-3      |             |             |             |
|-----------------|-----------------|-------------|-------------------|-------------|-------------|-------------|-------------|
|                 |                 | SSII-2-1852 | SSII-2-1795       | SSII-3+3900 | SSII-3+3796 | SSII-3+4195 | SSII-3+4326 |
| Ce64-7          | <i>indica</i>   | T           | CTACCACTTATAGATTA | T           | A           | G           | GC          |
| Gui99           | <i>indica</i>   | T           | CTACCACTTATAGATTA | T           | A           | G           | GC          |
| C bao           | <i>japonica</i> | T           | CTACCACTTATAGATTA | T           | A           | G           | GC          |
| Nipponbare      | <i>japonica</i> | C           | -----             | T           | A           | T           | TT          |
| 93-11           | <i>indica</i>   | T           | CTACCACTTATAGATTA | T           | A           | G           | GC          |
| Minghui63       | <i>indica</i>   | C           | CTACCACTTATAGATTA | G           | G           | G           | TT          |
| Xiushui11       | <i>japonica</i> | C           | -----             | T           | A           | G           | GC          |
| Xiushui04       | <i>japonica</i> | C           | -----             | T           | A           | G           | GC          |
| Yongyou1        | <i>japonica</i> | C           | -----             | T           | A           | G           | GC          |
| Changyou94      | <i>japonica</i> | C           | -----             | T           | A           | G           | GC          |
| Yongjing04      | <i>japonica</i> | C           | -----             | T           | A           | G           | GC          |
| Xiushui63       | <i>japonica</i> | C           | -----             | T           | A           | G           | GC          |
| Sengkeu         | <i>japonica</i> | C           | -----             | T           | A           | G           | GC          |
| Chunjiang06     | <i>japonica</i> | C           | -----             | T           | A           | G           | GC          |
| Wuyunjing7      | <i>japonica</i> | C           | -----             | T           | A           | G           | GC          |
| Zhongchao123    | <i>japonica</i> | C           | -----             | T           | A           | G           | GC          |
| Teqing          | <i>indica</i>   | T           | CTACCACTTATAGATTA | G           | G           | G           | TT          |
| Zhong9B         | <i>indica</i>   | T           | CTACCACTTATAGATTA | G           | G           | G           | TT          |
| Liantangzao     | <i>indica</i>   | T           | CTACCACTTATAGATTA | G           | G           | G           | TT          |
| Lunhui422       | <i>japonica</i> | T           | CTACCACTTATAGATTA | T           | A           | G           | GC          |
| 9308            | <i>indica</i>   | T           | CTACCACTTATAGATTA | G           | G           | G           | TT          |
| TaichungNative1 | <i>indica</i>   | T           | CTACCACTTATAGATTA | T           | A           | G           | GC          |
| 2070            | <i>indica</i>   | C           | CTACCACTTATAGATTA | T           | A           | G           | GC          |
| 02428           | <i>japonica</i> | C           | -----             | G           | G           | G           | TT          |
| Ji 86-11        | <i>japonica</i> | C           | -----             | T           | A           | G           | GC          |

|                   |                 |   |                   |   |   |   |    |
|-------------------|-----------------|---|-------------------|---|---|---|----|
| Zhaiyeqing8       | <i>indica</i>   | T | CTACCACTTATAGATTA | G | G | G | TT |
| LongtefuB         | <i>indica</i>   | T | CTACCACTTATAGATTA | T | A | G | GC |
| 98110             | <i>japonica</i> | C | -----             | T | A | G | GC |
| Nanjing6          | <i>indica</i>   | T | CTACCACTTATAGATTA | T | G | G | TT |
| Miyang46          | <i>indica</i>   | T | CTACCACTTATAGATTA | T | A | G | GC |
| Zhefu802          | <i>indica</i>   | T | CTACCACTTATAGATTA | T | G | G | TT |
| Guangluai4        | <i>indica</i>   | T | CTACCACTTATAGATTA | T | G | G | TT |
| IAPAR9            | <i>japonica</i> | C | -----             | T | G | G | TT |
| Zhonghan3         | <i>japonica</i> | C | -----             | T | G | G | TT |
| Kinmaze           | <i>japonica</i> | C | -----             | T | A | G | GC |
| Zhongxiangnuo     | <i>indica</i>   | T | CTACCACTTATAGATTA | T | A | G | GC |
| Guixiangsinuo     | <i>indica</i>   | T | CTACCACTTATAGATTA | T | A | G | GC |
| Nanfengnuo        | <i>indica</i>   | T | CTACCACTTATAGATTA | T | A | G | GC |
| Qiufengnuo        | <i>japonica</i> | C | -----             | T | A | G | GC |
| Shaonuo           | <i>japonica</i> | C | -----             | T | A | T | TT |
| Suyunuo           | <i>japonica</i> | C | -----             | T | A | T | TT |
| Guanglingxiangnuo | <i>japonica</i> | C | -----             | T | A | T | TT |
| Taichungsen46     | <i>japonica</i> | C | -----             | T | A | T | TT |
| Zhendao5125       | <i>japonica</i> | C | -----             | T | A | G | GC |
| Nongken58         | <i>japonica</i> | C | -----             | T | A | G | GC |
| Kasalath          | <i>indica</i>   | T | CTACCACTTATAGATTA | G | G | G | TT |
| Juanguang         | <i>japonica</i> | C | -----             | T | A | G | GC |
| Koshihikari       | <i>japonica</i> | C | -----             | T | A | G | GC |
| Huangjinqing      | <i>japonica</i> | C | -----             | T | A | G | GC |
| Yangguang         | <i>japonica</i> | C | -----             | T | A | G | GC |
| Taiwannuo         | <i>indica</i>   | T | CTACCACTTATAGATTA | T | A | G | GC |
| Zhenshan97B       | <i>indica</i>   | T | CTACCACTTATAGATTA | G | G | G | TT |
| XieqingzaoB       | <i>indica</i>   | T | CTACCACTTATAGATTA | G | G | G | TT |

|                   |                 |   |                   |   |   |   |    |
|-------------------|-----------------|---|-------------------|---|---|---|----|
| Gang46B           | <i>indica</i>   | T | CTACCACTTATAGATTA | G | G | G | TT |
| Chunjiang025      | <i>japonica</i> | C | -----             | T | A | G | GC |
| Guichao2#         | <i>indica</i>   | T | CTACCACTTATAGATTA | T | A | G | GC |
| Taihunuo          | <i>japonica</i> | C | -----             | T | A | G | GC |
| Jiangzhouxiangnuo | <i>japonica</i> | C | -----             | T | A | G | GC |
| Zhongjian 100     | <i>indica</i>   | T | CTACCACTTATAGATTA | T | A | G | GC |
| Jingxi17          | <i>japonica</i> | C | -----             | T | A | G | GC |
| C418              | <i>japonica</i> | C | -----             | T | A | G | GC |
| IR36              | <i>indica</i>   | T | CTACCACTTATAGATTA | G | G | G | TT |
| IR64              | <i>indica</i>   | T | CTACCACTTATAGATTA | G | G | G | TT |
| IR24              | <i>indica</i>   | T | CTACCACTTATAGATTA | T | A | G | GC |
| IRBB5             | <i>indica</i>   | T | CTACCACTTATAGATTA | T | A | G | GC |
| IRBB13            | <i>indica</i>   | T | CTACCACTTATAGATTA | T | A | G | GC |
| IRBB50            | <i>indica</i>   | T | CTACCACTTATAGATTA | G | G | G | TT |
| Xiushui110        | <i>japonica</i> | C | -----             | T | A | G | GC |
| Jiazao935         | <i>indica</i>   | T | CTACCACTTATAGATTA | T | A | G | GC |
| Jiahua1           | <i>japonica</i> | C | -----             | T | A | G | GC |

**Continual-6**

| Varieties       | Subspecies      | SSIII-1      |              |             |              | SSIII-2      |              |              |
|-----------------|-----------------|--------------|--------------|-------------|--------------|--------------|--------------|--------------|
|                 |                 | SSIII-1-1096 | SSIII-1-1039 | SSIII-1-868 | SSIII-2-1304 | SSIII-2-1287 | SSIII-2-1147 | SSIII-2-1078 |
| Ce64-7          | <i>indica</i>   | -            | AG           | G           | G            | -            | A            | T            |
| Gui99           | <i>indica</i>   | G            | AG           | G           | G            | -            | G            | C            |
| C bao           | <i>japonica</i> | G            | AG           | G           | G            | -            | G            | C            |
| Nipponbare      | <i>japonica</i> | G            | --           | G           | G            | T            | A            | C            |
| 93-11           | <i>indica</i>   | G            | AG           | T           | G            | -            | A            | T            |
| Minghui63       | <i>indica</i>   | G            | AG           | G           | G            | -            | A            | C            |
| Xiushui11       | <i>japonica</i> | G            | --           | G           | G            | T            | A            | C            |
| Xiushui04       | <i>japonica</i> | G            | --           | G           | A            | -            | A            | C            |
| Yongyou1        | <i>japonica</i> | G            | --           | G           | G            | T            | A            | C            |
| Changyou94      | <i>japonica</i> | G            | --           | G           | G            | T            | A            | C            |
| Yongjing04      | <i>japonica</i> | G            | --           | G           | G            | T            | A            | C            |
| Xiushui63       | <i>japonica</i> | G            | --           | G           | G            | T            | A            | C            |
| Sengkeu         | <i>japonica</i> | G            | --           | G           | G            | T            | A            | C            |
| Chunjiang06     | <i>japonica</i> | G            | --           | G           | A            | -            | A            | C            |
| Wuyunjing7      | <i>japonica</i> | G            | --           | G           | A            | -            | A            | C            |
| Zhongchao123    | <i>japonica</i> | G            | --           | G           | A            | -            | A            | C            |
| Teqing          | <i>indica</i>   | G            | AG           | G           | G            | -            | A            | T            |
| Zhong9B         | <i>indica</i>   | G            | AG           | G           | G            | -            | A            | T            |
| Liantangzao     | <i>indica</i>   | -            | AG           | G           | G            | -            | G            | C            |
| Lunhui422       | <i>japonica</i> | G            | AG           | G           | G            | -            | G            | C            |
| 9308            | <i>indica</i>   | G            | AG           | G           | G            | T            | A            | C            |
| TaichungNative1 | <i>indica</i>   | -            | AG           | G           | G            | -            | G            | C            |
| 2070            | <i>indica</i>   | G            | AG           | G           | G            | -            | A            | C            |
| 02428           | <i>japonica</i> | G            | AG           | T           | G            | -            | A            | T            |
| Ji 86-11        | <i>japonica</i> | G            | --           | G           | G            | T            | A            | C            |



|                   |                 |   |    |   |   |   |   |   |
|-------------------|-----------------|---|----|---|---|---|---|---|
| Zhaiyeqing8       | <i>indica</i>   | G | AG | G | G | - | G | C |
| LongtefuB         | <i>indica</i>   | - | AG | G | G | - | A | T |
| 98110             | <i>japonica</i> | G | -- | G | G | T | A | C |
| Nanjing6          | <i>indica</i>   | - | AG | G | G | - | G | C |
| Miyang46          | <i>indica</i>   | G | AG | G | G | - | G | C |
| Zhefu802          | <i>indica</i>   | - | AG | G | G | - | A | T |
| Guangluai4        | <i>indica</i>   | - | AG | G | G | - | A | T |
| IAPAR9            | <i>japonica</i> | G | AG | G | G | - | A | C |
| Zhonghan3         | <i>japonica</i> | G | AG | G | G | - | A | T |
| Kinmaze           | <i>japonica</i> | G | -- | G | G | T | A | C |
| Zhongxiangnuo     | <i>indica</i>   | G | AG | G | G | - | A | T |
| Guixiangsinuo     | <i>indica</i>   | G | AG | G | G | - | A | T |
| Nanfengnuo        | <i>indica</i>   | G | AG | G | G | - | A | C |
| Qiufengnuo        | <i>japonica</i> | G | -- | G | G | - | A | C |
| Shaonuo           | <i>japonica</i> | G | -- | G | G | T | A | C |
| Suyunuo           | <i>japonica</i> | G | AG | T | A | - | A | C |
| Guanglingxiangnuo | <i>japonica</i> | G | -- | G | G | - | A | C |
| Taichungsen46     | <i>japonica</i> | G | -- | G | G | T | A | C |
| Zhendao5125       | <i>japonica</i> | G | -- | G | A | - | A | C |
| Nongken58         | <i>japonica</i> | G | -- | G | A | - | A | C |
| Kasalath          | <i>indica</i>   | G | AG | G | G | - | A | C |
| Juanguang         | <i>japonica</i> | G | -- | G | G | T | A | C |
| Koshihikari       | <i>japonica</i> | G | -- | G | G | T | A | C |
| Huangjinqing      | <i>japonica</i> | G | -- | G | G | T | A | C |
| Yangguang         | <i>japonica</i> | G | -- | G | G | - | A | C |
| Taiwannuo         | <i>indica</i>   | - | AG | G | G | - | A | C |
| Zhenshan97B       | <i>indica</i>   | - | AG | G | G | - | A | T |
| XieqingzaoB       | <i>indica</i>   | - | AG | G | G | - | A | T |

|                   |                 |   |    |   |   |   |   |   |
|-------------------|-----------------|---|----|---|---|---|---|---|
| Gang46B           | <i>indica</i>   | - | AG | G | G | - | A | T |
| Chunjiang025      | <i>japonica</i> | G | -- | G | G | T | A | C |
| Guichao2#         | <i>indica</i>   | G | AG | G | G | - | A | T |
| Taihunuo          | <i>japonica</i> | G | AG | T | A | - | A | C |
| Jiangzhouxiangnuo | <i>japonica</i> | G | -- | G | A | - | A | C |
| Zhongjian 100     | <i>indica</i>   | - | AG | G | G | T | A | C |
| Jingxi17          | <i>japonica</i> | G | -- | G | G | T | A | C |
| C418              | <i>japonica</i> | G | -- | G | G | T | A | C |
| IR36              | <i>indica</i>   | G | AG | G | G | - | A | C |
| IR64              | <i>indica</i>   | G | AG | G | G | - | A | C |
| IR24              | <i>indica</i>   | G | AG | G | G | - | G | C |
| IRBB5             | <i>indica</i>   | G | AG | G | G | - | G | C |
| IRBB13            | <i>indica</i>   | G | AG | G | G | - | G | C |
| IRBB50            | <i>indica</i>   | G | AG | G | G | - | G | C |
| Xiushui110        | <i>japonica</i> | G | -- | G | G | T | A | C |
| Jiazao935         | <i>indica</i>   | - | AG | G | G | - | G | C |
| Jiahua1           | <i>japonica</i> | G | -- | G | G | T | A | C |

---

Continual-7

| Varieties       | Subspecies      | SSIV-1      |                 | SSIV-2                 |
|-----------------|-----------------|-------------|-----------------|------------------------|
|                 |                 | SSIV-1-1426 | SSIV-2+273      | SSIV-2+437             |
| Ce64-7          | <i>indica</i>   | -----       | GGGTTGGGTTGGGTT | CACCGGAATGTTCCACCTATCT |
| Gui99           | <i>indica</i>   | -----       | GGGTTGGGTTGGGTT | CACCGGAATGTTCCACCTATCT |
| C bao           | <i>japonica</i> | -----       | GGGTTGGGTT      | CACCGGAATGTTCCACCTATCT |
| Nipponbare      | <i>japonica</i> | CGTCGC      | GGGTTGGGTTGGGTT | CACCGGAATGTTCCACCTATCT |
| 93-11           | <i>indica</i>   | -----       | GGGTTGGGTT      | CACCGGAATGTTCCACCTATCT |
| Minghui63       | <i>indica</i>   | -----       | GGGTTGGGTTGGGTT | CACCGGAATGTTCCACCTATCT |
| Xiushui11       | <i>japonica</i> | CGTCGC      | GGGTTGGGTTGGGTT | CACCGGAATGTTCCACCTATCT |
| Xiushui04       | <i>japonica</i> | CGTCGC      | GGGTTGGGTTGGGTT | CACCGGAATGTTCCACCTATCT |
| Yongyou1        | <i>japonica</i> | CGTCGC      | GGGTTGGGTTGGGTT | CACCGGAATGTTCCACCTATCT |
| Changyou94      | <i>japonica</i> | CGTCGC      | GGGTTGGGTTGGGTT | CACCGGAATGTTCCACCTATCT |
| Yongjing04      | <i>japonica</i> | CGTCGC      | GGGTTGGGTTGGGTT | CACCGGAATGTTCCACCTATCT |
| Xiushui63       | <i>japonica</i> | CGTCGC      | GGGTTGGGTTGGGTT | CACCGGAATGTTCCACCTATCT |
| Sengkeu         | <i>japonica</i> | CGTCGC      | GGGTTGGGTTGGGTT | CACCGGAATGTTCCACCTATCT |
| Chunjiang06     | <i>japonica</i> | CGTCGC      | GGGTTGGGTTGGGTT | CACCGGAATGTTCCACCTATCT |
| Wuyunjing7      | <i>japonica</i> | CGTCGC      | GGGTTGGGTTGGGTT | CACCGGAATGTTCCACCTATCT |
| Zhongchao123    | <i>japonica</i> | CGTCGC      | GGGTTGGGTTGGGTT | CACCGGAATGTTCCACCTATCT |
| Teqing          | <i>indica</i>   | -----       | GGGTTGGGTTGGGTT | CACCGGAATGTTCCACCTATCT |
| Zhong9B         | <i>indica</i>   | -----       | GGGTTGGGTT      | CACCGGAATGTTCCACCTATCT |
| Liantangzao     | <i>indica</i>   | -----       | GGGTTGGGTT      | CACCGGAATGTTCCACCTATCT |
| Lunhui422       | <i>japonica</i> | -----       | GGGTTGGGTT      | CACCGGAATGTTCCACCTATCT |
| 9308            | <i>indica</i>   | -----       | GGGTTGGGTTGGGTT | CACCGGAATGTTCCACCTATCT |
| TaichungNative1 | <i>indica</i>   | -----       | GGGTTGGGTT      | CACCGGAATGTTCCACCTATCT |
| 2070            | <i>indica</i>   | -----       | GGGTTGGGTTGGGTT | CACCGGAATGTTCCACCTATCT |
| 02428           | <i>japonica</i> | -----       | GGGTTGGGTT      | CACCGGAATGTTCCACCTATCT |
| Ji 86-11        | <i>japonica</i> | CGTCGC      | GGGTTGGGTTGGGTT | CACCGGAATGTTCCACCTATCT |

|                   |                 |        |                 |                        |
|-------------------|-----------------|--------|-----------------|------------------------|
| Zhaiyeqing8       | <i>indica</i>   | -----  | GGGTTGGGTT      | CACCGGAATGTTCCACCTATCT |
| LongtefuB         | <i>indica</i>   | CGTCGC | GGGTTGGGTT      | CACCGGAATGTTCCACCTATCT |
| 98110             | <i>japonica</i> | CGTCGC | GGGTTGGGTTGGGTT | CACCGGAATGTTCCACCTATCT |
| Nanjing6          | <i>indica</i>   | -----  | GGGTTGGGTT      | CACCGGAATGTTCCACCTATCT |
| Miyang46          | <i>indica</i>   | -----  | GGGTTGGGTTGGGTT | CACCGGAATGTTCCACCTATCT |
| Zhefu802          | <i>indica</i>   | -----  | GGGTTGGGTT      | CACCGGAATGTTCCACCTATCT |
| Guangluai4        | <i>indica</i>   | -----  | GGGTTGGGTT      | CACCGGAATGTTCCACCTATCT |
| IAPAR9            | <i>japonica</i> | -----  | GGGTTGGGTTGGGTT | CACCGGAATGTTCCACCTATCT |
| Zhonghan3         | <i>japonica</i> | -----  | GGGTTGGGTTGGGTT | CACCGGAATGTTCCACCTATCT |
| Kinmaze           | <i>japonica</i> | CGTCGC | GGGTTGGGTTGGGTT | CACCGGAATGTTCCACCTATCT |
| Zhongxiangnuo     | <i>indica</i>   | -----  | GGGTTGGGTT      | CACCGGAATGTTCCACCTATCT |
| Guixiangsinuo     | <i>indica</i>   | -----  | GGGTTGGGTTGGGTT | CACCGGAATGTTCCACCTATCT |
| Nanfengnuo        | <i>indica</i>   | -----  | GGGTTGGGTT      | CACCGGAATGTTCCACCTATCT |
| Qiufengnuo        | <i>japonica</i> | CGTCGC | GGGTTGGGTTGGGTT | -----                  |
| Shaonuo           | <i>japonica</i> | CGTCGC | GGGTTGGGTTGGGTT | CACCGGAATGTTCCACCTATCT |
| Suyunuo           | <i>japonica</i> | CGTCGC | GGGTTGGGTTGGGTT | -----                  |
| Guanglingxiangnuo | <i>japonica</i> | CGTCGC | GGGTTGGGTTGGGTT | CACCGGAATGTTCCACCTATCT |
| Taichungsen46     | <i>japonica</i> | CGTCGC | GGGTTGGGTTGGGTT | CACCGGAATGTTCCACCTATCT |
| Zhendao5125       | <i>japonica</i> | CGTCGC | GGGTTGGGTTGGGTT | CACCGGAATGTTCCACCTATCT |
| Nongken58         | <i>japonica</i> | CGTCGC | GGGTTGGGTTGGGTT | CACCGGAATGTTCCACCTATCT |
| Kasalath          | <i>indica</i>   | -----  | GGGTTGGGTT      | CACCGGAATGTTCCACCTATCT |
| Juanguang         | <i>japonica</i> | CGTCGC | GGGTTGGGTTGGGTT | CACCGGAATGTTCCACCTATCT |
| Koshihikari       | <i>japonica</i> | CGTCGC | GGGTTGGGTTGGGTT | CACCGGAATGTTCCACCTATCT |
| Huangjinjing      | <i>japonica</i> | CGTCGC | GGGTTGGGTTGGGTT | CACCGGAATGTTCCACCTATCT |
| Yangguang         | <i>japonica</i> | CGTCGC | GGGTTGGGTTGGGTT | CACCGGAATGTTCCACCTATCT |
| Taiwannuo         | <i>indica</i>   | -----  | GGGTTGGGTT      | CACCGGAATGTTCCACCTATCT |
| Zhenshan97B       | <i>indica</i>   | CGTCGC | GGGTTGGGTT      | CACCGGAATGTTCCACCTATCT |
| XieqingzaoB       | <i>indica</i>   | -----  | GGGTTGGGTT      | CACCGGAATGTTCCACCTATCT |

|                   |                 |        |                 |                        |
|-------------------|-----------------|--------|-----------------|------------------------|
| Gang46B           | <i>indica</i>   | -----  | GGGTTGGGTT      | CACCGGAATGTTCCACCTATCT |
| Chunjiang025      | <i>japonica</i> | CGTCGC | GGGTTGGGTTGGGTT | CACCGGAATGTTCCACCTATCT |
| Guichao2#         | <i>indica</i>   | -----  | GGGTTGGGTT      | CACCGGAATGTTCCACCTATCT |
| Taihunuo          | <i>japonica</i> | CGTCGC | GGGTTGGGTTGGGTT | CACCGGAATGTTCCACCTATCT |
| Jiangzhouxiangnuo | <i>japonica</i> | CGTCGC | GGGTTGGGTTGGGTT | CACCGGAATGTTCCACCTATCT |
| Zhongjian 100     | <i>indica</i>   | -----  | GGGTTGGGTT      | CACCGGAATGTTCCACCTATCT |
| Jingxi17          | <i>japonica</i> | CGTCGC | GGGTTGGGTTGGGTT | CACCGGAATGTTCCACCTATCT |
| C418              | <i>japonica</i> | CGTCGC | GGGTTGGGTTGGGTT | CACCGGAATGTTCCACCTATCT |
| IR36              | <i>indica</i>   | -----  | GGGTTGGGTT      | CACCGGAATGTTCCACCTATCT |
| IR64              | <i>indica</i>   | -----  | GGGTTGGGTT      | CACCGGAATGTTCCACCTATCT |
| IR24              | <i>indica</i>   | -----  | GGGTTGGGTT      | CACCGGAATGTTCCACCTATCT |
| IRBB5             | <i>indica</i>   | -----  | GGGTTGGGTTGGGTT | CACCGGAATGTTCCACCTATCT |
| IRBB13            | <i>indica</i>   | -----  | GGGTTGGGTTGGGTT | CACCGGAATGTTCCACCTATCT |
| IRBB50            | <i>indica</i>   | -----  | GGGTTGGGTTGGGTT | CACCGGAATGTTCCACCTATCT |
| Xiushui110        | <i>japonica</i> | CGTCGC | GGGTTGGGTTGGGTT | CACCGGAATGTTCCACCTATCT |
| Jiazao935         | <i>indica</i>   | -----  | GGGTTGGGTT      | CACCGGAATGTTCCACCTATCT |
| Jiahua1           | <i>japonica</i> | CGTCGC | GGGTTGGGTTGGGTT | CACCGGAATGTTCCACCTATCT |

---
