# Supplementary material
Source: PubMed Central journal article supplement (PMC2799822)
Supplement: 0912396106_ST4_PDF.pdf [file 0912396106_ST4_PDF.pdf]

**Table S4.** The haplotypes of individual genes involved in the starch synthesis pathway determined based on the association sites in 70 tested rice varieties

| Varieties         | Subspecies      | Haplotypes     |                 |                     |               |              |              |             |              |                 |                  |                |
|-------------------|-----------------|----------------|-----------------|---------------------|---------------|--------------|--------------|-------------|--------------|-----------------|------------------|----------------|
|                   |                 | AGPiso<br>-511 | AGPlar<br>-1633 | Wx<br>-1160<br>+111 | SBE3<br>+3577 | ISA<br>-1326 | ISA<br>-1499 | PUL<br>+855 | SSI<br>+3216 | SSII-3<br>+3796 | SSIII-2<br>-1078 | SSIV-2<br>+437 |
| 02428             | <i>japonica</i> | I              | II              | II                  | I             | II           | II           | I           | I            | II              | I                | I              |
| 2070              | <i>indica</i>   | I              | II              | II                  | II            | I            | I            | I           | II           | I               | II               | I              |
| 9308 *            | <i>indica</i>   | I              | II              | II                  | I             | I            | I            | II          | II           | II              | II               | I              |
| 93-11 *           | <i>indica</i>   | II             | II              | II                  | I             | I            | I            | II          | I            | I               | I                | I              |
| 98110             | <i>japonica</i> | II             | II              | II                  | II            | II           | I            | II          | II           | I               | II               | I              |
| IAPAR9            | <i>japonica</i> | II             | I               | III                 | I             | I            | I            | II          | II           | I               | II               | I              |
| C bao             | <i>japonica</i> | I              | II              | II                  | I             | I            | I            | I           | II           | I               | II               | I              |
| C418              | <i>japonica</i> | I              | II              | II                  | I             | I            | I            | II          | I            | I               | I                | I              |
| Ce64-7            | <i>indica</i>   | II             | II              | I                   | II            | II           | I            | II          | II           | I               | II               | I              |
| Changyou94        | <i>japonica</i> | II             | II              | II                  | II            | II           | I            | II          | II           | I               | II               | I              |
| Chunjiang025      | <i>japonica</i> | II             | II              | II                  | II            | II           | I            | II          | II           | I               | II               | I              |
| Chunjiang06 *     | <i>japonica</i> | I              | I               | II                  | I             | I            | I            | II          | II           | II              | I                | I              |
| Gang46B           | <i>indica</i>   | II             | II              | III                 | II            | II           | I            | II          | II           | I               | II               | I              |
| Guanglingxiangnuo | <i>japonica</i> | I              | I               | I                   | I             | I            | I            | II          | II           | II              | I                | I              |
| Guangluai4        | <i>indica</i>   | I              | II              | III                 | I             | I            | I            | II          | II           | I               | II               | I              |
| Gui99             | <i>indica</i>   | I              | I               | II                  | I             | I            | I            | II          | I            | I               | I                | I              |
| Guichao2 *        | <i>indica</i>   | I              | II              | III                 | II            | I            | I            | II          | II           | I               | I                | I              |
| Guixiangsinuo *   | <i>indica</i>   | II             | II              | I                   | II            | II           | I            | II          | II           | I               | II               | I              |
| Huangjinqing      | <i>japonica</i> | II             | II              | II                  | II            | II           | II           | I           | II           | II              | II               | I              |

|                     |                 |    |    |     |    |    |    |    |    |    |    |    |
|---------------------|-----------------|----|----|-----|----|----|----|----|----|----|----|----|
| IR24                | <i>indica</i>   | I  | I  | II  | I  | I  | I  | II | II | I  | II | I  |
| IR36                | <i>indica</i>   | I  | II | III | I  | I  | I  | I  | II | II | II | I  |
| IR64                | <i>indica</i>   | I  | II | III | I  | I  | I  | I  | II | II | II | I  |
| IRBB13              | <i>indica</i>   | I  | II | II  | I  | I  | I  | II | II | I  | II | I  |
| IRBB5               | <i>indica</i>   | II | II | II  | I  | I  | I  | II | II | I  | II | I  |
| IRBB50              | <i>indica</i>   | II | II | II  | I  | I  | I  | II | II | II | II | I  |
| Ji 86-11            | <i>japonica</i> | II | II | II  | II | II | I  | II | II | I  | II | I  |
| Jiahua1             | <i>japonica</i> | II | II | II  | II | II | I  | II | II | I  | II | I  |
| Jiangzhouxiangnuo * | <i>japonica</i> | II | II | I   | II | II | I  | II | II | I  | II | I  |
| Jiazao935           | <i>indica</i>   | I  | II | II  | I  | I  | I  | II | II | I  | II | I  |
| Jingxi17            | <i>japonica</i> | II | II | II  | II | II | I  | II | II | I  | II | I  |
| Kinmaze             | <i>japonica</i> | II | II | II  | II | II | I  | II | II | I  | II | I  |
| Juanguang           | <i>japonica</i> | II | II | II  | II | II | I  | I  | II | II | II | I  |
| Kasalath *          | <i>indica</i>   | II | II | III | II | II | I  | II | II | I  | II | I  |
| Liantangzao         | <i>indica</i>   | II | II | III | II | II | I  | II | II | I  | II | I  |
| LongtefuB *         | <i>indica</i>   | I  | I  | III | I  | I  | I  | II | I  | II | II | I  |
| Lunhui422           | <i>japonica</i> | I  | II | II  | I  | I  | I  | II | II | I  | I  | I  |
| Minghui63 *         | <i>indica</i>   | I  | II | II  | I  | I  | I  | II | I  | I  | II | I  |
| Miyang46            | <i>indica</i>   | I  | II | II  | II | I  | I  | I  | II | II | II | I  |
| Nanfengnuo          | <i>indica</i>   | I  | II | I   | I  | I  | I  | II | II | I  | II | I  |
| Nanjing6            | <i>indica</i>   | I  | I  | III | II | I  | I  | II | II | I  | II | I  |
| Nipponbare *        | <i>japonica</i> | I  | I  | II  | I  | I  | I  | II | I  | II | II | I  |
| Nongken58           | <i>japonica</i> | II | II | II  | II | II | I  | II | II | I  | II | I  |
| Qiufengnuo          | <i>japonica</i> | II | II | I   | II | II | I  | II | II | I  | II | I  |
| Sengkeu             | <i>japonica</i> | II | II | II  | II | II | II | II | II | I  | II | II |

|                  |                 |    |    |     |    |    |    |    |    |    |    |    |
|------------------|-----------------|----|----|-----|----|----|----|----|----|----|----|----|
| Shaonuo          | <i>japonica</i> | II | II | I   | II | II | I  | II | II | I  | II | I  |
| Suyunuo *        | <i>japonica</i> | II | II | I   | II | II | I  | II | II | I  | II | I  |
| Taihunuo *       | <i>japonica</i> | I  | II | I   | II | II | II | II | II | I  | II | II |
| Taiwannuo        | <i>indica</i>   | I  | I  | I   | II | I  | I  | II | I  | I  | II | I  |
| TaichungNative1* | <i>indica</i>   | II | II | III | II | II | I  | II | II | I  | II | I  |
| Taichungsen46    | <i>japonica</i> | II | II | I   | II | II | I  | II | II | I  | II | I  |
| Teqing           | <i>indica</i>   | I  | II | III | II | I  | I  | II | I  | I  | II | I  |
| Wuyunjing7*      | <i>japonica</i> | I  | II | II  | I  | I  | I  | II | I  | II | I  | I  |
| XieqingzaoB      | <i>indica</i>   | II | II | III | II | II | I  | II | II | I  | II | I  |
| Xiushui04        | <i>japonica</i> | I  | I  | II  | I  | I  | I  | II | II | II | I  | I  |
| Xiushui11        | <i>japonica</i> | II | II | II  | II | II | I  | II | II | I  | II | I  |
| Xiushui110       | <i>japonica</i> | II | II | II  | II | II | I  | II | II | I  | II | I  |
| Xiushui63        | <i>japonica</i> | II | II | II  | II | II | I  | II | II | I  | II | I  |
| Yangguang        | <i>japonica</i> | II | II | II  | II | II | I  | II | II | I  | II | I  |
| Yongjing04       | <i>japonica</i> | I  | II | II  | II | II | I  | II | II | I  | II | I  |
| Yongyou1         | <i>japonica</i> | II | II | II  | II | II | I  | II | II | I  | II | I  |
| Koshihikari      | <i>japonica</i> | II | II | II  | I  | II | I  | II | II | I  | II | I  |
| Zhefu802         | <i>indica</i>   | I  | II | III | I  | I  | I  | II | II | II | II | I  |
| Zhaiyeqing8      | <i>indica</i>   | I  | I  | III | I  | I  | I  | II | I  | II | I  | I  |
| Zhendao5125      | <i>japonica</i> | I  | II | I   | II | II | I  | II | II | I  | II | I  |
| Zhenshan97B*     | <i>indica</i>   | I  | I  | III | I  | I  | I  | II | II | II | I  | I  |
| Zhong9B          | <i>indica</i>   | I  | II | III | I  | I  | I  | II | II | II | I  | I  |
| Zhongchao123     | <i>japonica</i> | II | II | II  | I  | II | I  | II | II | I  | II | I  |
| Zhonghan3*       | <i>japonica</i> | II | II | III | II | II | II | I  | II | II | I  | I  |
| Zhongjian 100    | <i>indica</i>   | I  | I  | II  | I  | I  | I  | II | II | I  | II | I  |

Zhongxiangnuo      *indica*      I      I      I      I      I      I      I      II      II      I      I      I

---

\*Indicate the core varieties
