# Supplementary material
Source: PubMed Central journal article supplement (PMC2799822)
Supplement: 0912396106_ST5_PDF.pdf [file 0912396106_ST5_PDF.pdf]

**Table S5.** Highly associated SNPs identified under Q+K model

| <b>Trait</b> | <b>SNP</b>           | <b>Estimate difference</b> | <b>F value</b> | <b>P value</b>      |
|--------------|----------------------|----------------------------|----------------|---------------------|
| <b>AC</b>    | <i>Wx</i> -1160      | 16.35                      | 104.09         | $3 \times 10^{-15}$ |
|              | <i>Wx</i> +111       | 16.55                      | 267.77         | $4 \times 10^{-24}$ |
|              | <i>SSII</i> -3+3796  | 8.51                       | 20.87          | $2 \times 10^{-5}$  |
| <b>GC</b>    | <i>Wx</i> -1160      | 36.68                      | 66.65          | $7 \times 10^{-11}$ |
|              | <i>Wx</i> +111       | 39.21                      | 150.40         | $1 \times 10^{-18}$ |
|              | <i>SBE3</i> +3577    | 17.87                      | 8.89           | $4 \times 10^{-5}$  |
|              | <i>SSII</i> -3+3796  | 22.26                      | 23.47          | $9 \times 10^{-6}$  |
| <b>GT</b>    | <i>SSII</i> -3+3796  | 5.14                       | 1423.32        | $5 \times 10^{-44}$ |
|              | <i>PUL</i> +855      | 2.93                       | 16.49          | $1 \times 10^{-4}$  |
|              | <i>SSIII</i> -1-1039 | 2.85                       | 9.40           | $3 \times 10^{-3}$  |
|              | <i>SSIV</i> -1-1426  | 2.99                       | 10.64          | $2 \times 10^{-3}$  |
