# Supplementary material
Source: PubMed Central journal article supplement (PMC2799822)
Supplement: 0912396106_ST6_PDF.pdf [file 0912396106_ST6_PDF.pdf]

**Table S6.** Comparison of main agronomic traits between the *Wx* transgenic lines and their wild types under normal field condition

| Features                            | WY (wild type) | Antisense <i>Wx</i> gene |             | Over-expression of <i>Wx</i> |              |
|-------------------------------------|----------------|--------------------------|-------------|------------------------------|--------------|
|                                     |                | WY-WxA-1                 | WY-WxA-2    | WY-WxO-1                     | WY-WxO-2     |
| Amylose content (%)                 | 15.43±0.42     | 1.17±0.29                | 2.63±0.36   | 22.34±0.22                   | 24.02±0.54   |
| Days to heading (d)                 | 90.75±2.48     | 91.36±1.17               | 90.97±9.43  | 89.64±4.23                   | 90.17±9.43   |
| Plant height (cm)                   | 105.47±1.25    | 104.63±2.86              | 102.50±1.10 | 103.37±2.01                  | 102.13±2.10  |
| Length of main panicle (cm)         | 17.06±0.27     | 17.19±0.43               | 17.36±0.78  | 17.04±0.48                   | 16.75±0.12   |
| No. of productive tillers per plant | 9.13±0.74      | 9.17±0.12                | 8.93±0.53   | 9.27±0.31                    | 9.57±0.91    |
| Grains No. per panicle              | 136.27±12.02   | 138.02±6.40              | 132.26±5.46 | 144.35±3.61                  | 146.39±15.53 |
| Seed setting (%)                    | 85.01±1.31     | 85.42±0.55               | 82.58±1.48  | 85.73±0.43                   | 84.35±1.21   |
| Grain weight (g/1000-grain)         | 24.32±0.59     | 22.92±0.32*              | 23.01±0.31  | 24.02±0.42                   | 24.80±0.88   |

\* means the least significant difference at 0.05 probability level, when compared with the wild type; no label means no significant difference.
