# Supplementary material
Source: PubMed Central journal article supplement (PMC2799822)
Supplement: 0912396106_ST7_PDF.pdf [file 0912396106_ST7_PDF.pdf]

**Table S7.** Primers for sequencing of the starch synthesis related genes in rice

| Gene name     | Primer set | Forward    | Primer sequences          | Reverse    | Primer sequences           |
|---------------|------------|------------|---------------------------|------------|----------------------------|
| <i>Wx</i>     | WX-1       | WX-1 F     | CAACAGAAACCACACACCACC     | WX-1 R     | CCTAACCAAACATAACGAACG      |
|               | WX-2       | WX-2 F     | CATTCCTTCAGTTCTTTGTCTATC  | WX-2 R     | GATTGGGGATTAGAATTTGAAGC    |
|               | WX-3       | WX-3 F     | CCACCCAAGAAACTGCTCCT      | WX-3 R     | CTAATGATGACTCCACCTTCTCC    |
|               | WX-4       | WX-4 F     | CGAGAGGGTGAGGTTTTTCC      | WX-4 R     | GTGAGCCGCATGATGTTGTC       |
|               | WX-5       | WX-5 F     | CGACGGGTATGAGTAAGATTC     | WX-5 R     | GGCTGGAGAAATCAACAAGG       |
|               | WX-6       | WX-6 F     | CAGGGGATGAGATACGGAAC      | WX-6 R     | CTGGTTCATTCGTCTCTCATCC     |
|               | WX-7       | WX-7 F     | TGCGAAGAAGTGGGAGAATG      | WX-7 R     | TCAACCAGAGCCACAACCTC       |
| <i>AGPiso</i> | AGPiso-1   | AGPiso-1F  | GCTTGGAACAACCTCTTATG      | AGPiso-1R  | CACGAAAAAGAACCTGAACAAG     |
|               | AGPiso-2   | AGPiso-2 F | CGAATGAAATGCTGTTTTATCTATG | AGPiso-2 R | CAATCTTTCCATCAACCTCTCAG    |
|               | AGPiso-3   | AGPiso-3 F | CAGGTTTGTCTGGGACTTTGAG    | AGPiso-3 R | CAAATGGATAGTAATGTAGTAACCG  |
|               | AGPiso-4   | AGPiso-4 F | CTGGTATCATTGTTATTTTCG     | AGPiso-4 R | GTTGGATAAGGCACGCTCATAG     |
|               | AGPiso-5   | AGPiso-5F  | CTACACAAATGCCTGACGAACC    | AGPiso-5 R | CCAGCAACCACAAAACACTAAG     |
|               | AGPiso-6   | AGPiso-6 F | GTTTGACCAGTAGTTTCCATTGTG  | AGPiso-6 R | GTCTCATACTTTGGAAACACG      |
|               | AGPiso-7   | AGPiso-7 F | GGCGAGAACACAAAGATAAGG     | AGPiso-7 R | CCCAACCTCTACCTTCAAATG      |
| <i>AGPsm</i>  | AGPsm-1    | AGPsm-1 F  | GTAGAAGGTGTAAATGAACGATGC  | AGPsm-1 R  | GTGAAATAGACTCGTCGGTAACTAAC |
|               | AGPsm-2    | AGPsm-2 F  | CGAGTTGGTAATGGTAAAGGATG   | AGPsm-2 R  | CAGTGGAGTGTGAGAGGCTTCAG    |
|               | AGPsm-3    | AGPsm-3 F  | CACACATCATCACTGGGACAAC    | AGPsm-3 R  | GCTTCGCCCTCTTCTTTGTC       |
|               | AGPsm-4    | AGPsm-4 F  | GCAGAGTGTCTTGGGATCATC     | AGPsm-4 R  | CCTCCCTTCATCATCAATCTTC     |
|               | AGPsm-5    | AGPsm-5 F  | GGAGTTTCTCATTTTGGCTGG     | AGPsm-5 R  | CTTCACCAATAAACTGTCTGTAC    |
|               | AGPsm-6    | AGPsm-6 F  | GCTTCTATGACCGTCTGCC       | AGPsm-6 R  | CTGGTCATCTCTGGAAAAGTG      |
|               | AGPsm-7    | AGPsm-7 F  | GGTTTTGCCTTGTGAGTATGG     | AGPsm-7 R  | CCACATTTGAGACACGGTTTTTC    |
| <i>ISA</i>    | ISA-1      | ISA-1 F    | GTTACTTGTGCCTGTGCCCGC     | ISA-1R     | CCAATTTATCCCGTTACTGAC      |
|               | ISA-2      | ISA-2 F    | GAGGCGTTTTTCGTGCTATCTAC   | ISA-2 R    | CACCCTCCTCCTCATCCTCC       |

|             |         |           |                            |           |                                |
|-------------|---------|-----------|----------------------------|-----------|--------------------------------|
|             | ISA-3   | ISA-3 F   | CCCCAACTATAAATAATCCACCG    | ISA-3 R   | CAGCAACCAGATAATCGGATAATG       |
|             | ISA-4   | ISA-4 F   | TACGGTATGCCAACGAATCAGT     | ISA-4 R   | GATGGTAGCGTTAGCAGTAGGTC        |
|             | ISA-5   | ISA-5 F   | CGAATCTTACTCTCGAAAAC TG    | ISA-5 R   | CAGGATGATTACAGTTGAAGGTAT<br>TC |
|             | ISA-6   | ISA-6 F   | GTGTTTGTGCCTACAGGGAGAG     | ISA-6 R   | GTTGTTACCTTTCCATTCCATTC        |
|             | ISA-7   | ISA-7 F   | GGGACTTATAATATCAAATGGAGGG  | ISA-7 R   | CAAATAGAAGCCTCACCAGACAC        |
|             | ISA-8   | ISA-8 F   | CGACTTGCGAGTAAAGAAAATG     | ISA-8 R   | GTTGTTGTTGCCTCCTTTTGTATG       |
|             | ISA-9   | ISA-9 F   | CCACTTTTATTAGTCACATCTTCTG  | ISA-9 R   | CAAGGATGATGGAGGAGTAGC          |
|             | ISA-10  | ISA-10 F  | CTTATGACTTCCTCACCGACGAC    | ISA-10 R  | CTTCGCCCTCTCTTCTGATG           |
| <i>SBE1</i> | SBE1-1  | SBE1-1 F  | GTGGTCAGAAGAAATCACGGAAG    | SBE1-1 R  | AGCAGTGGGGGAATAAAAACG          |
|             | SBE1-2  | SBE1-2 F  | CACCAAAAAGCAACTGATAACAAG   | SBE1-2 R  | CGAAGAAACCACGCTCAGG            |
|             | SBE1-3  | SBE1-3 F  | GGTTATTGATGGTGTGGTGGTC     | SBE1-3 R  | CACGAAAAAACAAGCAAGCG           |
|             | SBE1-4  | SBE1-4 F  | GTGTGGTGTCTGTCTTCCCTCC     | SBE1-4 R  | GAGAGTTTCCAAGCATAGGAGC         |
|             | SBE1-5  | SBE1-5 F  | CTGCTTTCCATCCTTCTCC        | SBE1-5 R  | CCA ACTACAATCGGACACAGATAA<br>C |
|             | SBE1-6  | SBE1-6 F  | CGGTAATAGAGATGTTTTGAGTTTTC | SBE1-6 R  | CCTTG TAGTTTTCCAGTAAATCCC      |
|             | SBE1-7  | SBE1-7 F  | GATAGGGGCTACCATAAACTCTG    | SBE1-7 R  | GA ACTAGCACCATGAAATCAACAA<br>C |
|             | SBE1-8  | SBE1-8 F  | CCTGCTTCACCTACCATCAAC      | SBE1-8 R  | CCTTGGCATTTCGTCTTTATC          |
|             | SBE1-9  | SBE1-9 F  | GCAGCACCTTTTGGTTGTTTG      | SBE1-9 R  | GAATGAGTTAGGGCGGTTGTTG         |
|             | SBE1-10 | SBE1-10 F | CTCCTAAACTATTGAGGCACCAC    | SBE1-10 R | GTGTTTTGTGTCATTGTGTGAGTG       |
| <i>SBE3</i> | SBE3-1  | SBE3-1 F  | GATGATGAGGAAAGGGGATAGAG    | SBE3-1 R  | CATTTTTCTGTTCTGCTCTGTCAC       |
|             | SBE3-2  | SBE3-2 F  | GAAAGGATGATGGACCACAGG      | SBE3-2 R  | CGGACGAGAACAACAAGGTG           |
|             | SBE3-3  | SBE3-3 F  | GAGGGTTTAGGTGGAAGCAGAG     | SBE3-3 R  | GTGGGACA ACTCGTGGTTTC          |
|             | SBE3-4  | SBE3-4 F  | AAGGCGTGAAGAGAGTGGTTG      | SBE3-4 R  | GGTAAATGGTGAGACTATCAAAG<br>AAC |
|             | SBE3-5  | SBE3-5 F  | AACCGCACATCACTTCTCTGG      | SBE3-5 R  | GCTTGATACAGGGAGATGCTC          |
|             | SBE3-6  | SBE3-6 F  | GAGAAGATGAGTAGCTTGAGGTTG   | SBE3-6 R  | GCACCTCATCCCTAAAGTTTG          |

SSII-3

|         |           |                              |           |                          |
|---------|-----------|------------------------------|-----------|--------------------------|
| SBE3-7  | SBE3-7 F  | GATTTTCCTGTACTATGCTGGCTG     | SBE3-7 R  | CACAGAAGATCCCACAAACTCAAG |
| SBE3-8  | SBE3-8 F  | GAAGGCTGTGGTGGTAAGTCTG       | SBE3-8 R  | CATCAGCATCAGTGGCAAATC    |
| SBE3-9  | SBE3-9 F  | CCTTTATCTTATGATTCCACCCTC     | SBE3-9 R  | GCGACAGCCGAGACAAAATC     |
| SBE3-10 | SBE3-10 F | TTGATGACCAAATGCTCCACC        | SBE3-10 R | CACACTTCTCTGACCACCTTCTG  |
| SBE3-11 | SBE3-11 F | TTGAAAGATGTGGTGCCAGAGT       | SBE3-11 R | CAATAATCAGGTGACAGAGCAAAG |
| SBE3-12 | SBE3-12 F | GGTTCTTGTACCTAGTATTTTCTGG    | SBE3-12 R | CCAACACGGTAGTCAAAATAGC   |
| SBE3-13 | SBE3-13 F | GATGGGGGTTTTCTTATGGC         | SBE3-13 R | GTTTTTCTTGCTCCTTCGCAC    |
| SBE3-14 | SBE3-14 F | GAATGAGAACACCAAGAGGCAG       | SBE3-14 R | CAACTCCTCTACCTTCCAAGCC   |
| SBE3-15 | SBE3-15 F | CTGTCCTCTCTCCATCAAATCC       | SBE3-15 R | CTTCCGTATCGTCTCCACCTC    |
| ALK-1   | ALK-1 F   | GACACGAAGGAGGCAAAGTAGAC      | ALK-1 R   | CAGGTAGAATGGCAGTGGTGG    |
| ALK-2   | ALK-2 F   | GCGACTATGGTTTGTGTGTGTTG      | ALK-2 R   | CTCCTCGTCGTCGTCCTCAC     |
| ALK-3   | ALK-3 F   | GATGATGGGGAGAACGAGG          | ALK-3 R   | CATCTCCAAGCCCACCTGTG     |
| ALK-4   | ALK-4 F   | CTTTGGCTGGGGAGAATGTC         | ALK-4 R   | GGAAGAGAGGAGCGTCAATG     |
| ALK-5   | ALK-5 F   | GAAATACTACAAGGCTGCTGGAC      | ALK-5 R   | GAAGAAGAGTTTATCGTGTCCCTG |
| ALK-6   | ALK-6 F   | CACTCGCTCTGTCCCTGTGATAC      | ALK-6 R   | GATGATGTCCACACCTTTCTGC   |
| ALK-7   | ALK-7 F   | GACGGCTACGCCAACTACAC         | ALK-7 R   | GCTTTTAGGTGTCTTTCCTGGTG  |
| ALK-8   | ALK-8 F   | TCAGATTGGTGAAGTTGTGCC        | ALK-8 R   | CATTGTTGTTGGAGGTGAGTGA   |
| SSI-1   | SSI-1 F   | GATGTGATGGGAAAGTTGGAAG       | SSI-1 R   | CAATGTTATGGGTTTGTGAAGTG  |
| SSI-2   | SSI-2 F   | GATTCTGATTCGGATGACGG         | SSI-2 R   | GCATTGATACGGGAGGAGAG     |
| SSI-3   | SSI-3 F   | GACACAGCAGCAGCAGGATC         | SSI-3 R   | GTTGTCATTGCTCCCTTCTGC    |
| SSI-4   | SSI-4 F   | GACCCACCTCGCTATCTGTTG        | SSI-4 R   | GGTAAACTCAACAAGGAATCAATC |
| SSI-5   | SSI-5 F   | GTCACAACCTGGTAATAGATGTAGATGG | SSI-5 R   | GCCATTTAGACTACAGGATTTTCC |
| SSI-6   | SSI-6 F   | TCTGAAAATCTCCCTGCCTATG       | SSI-6 R   | CAGCAGTTGTGACCTCCCAT     |
| SSI-7   | SSI-7 F   | CTGTCAGCCAGGTGAGATTCC        | SSI-7 R   | GGAAATAACAGACTGGCTGGC    |
| SSI-8   | SSI-8 F   | GCAAGTCATAAAAGAAAGATAGCAG    | SSI-8 R   | CCTGCAATATGTCCCAAGTAGC   |
| SSI-9   | SSI-9 F   | GAGAAAGGAGAGCAGGGTACAG       | SSI-9 R   | CCTCGCTTCATTAGACCCTCC    |

|               |           |             |                           |             |                          |
|---------------|-----------|-------------|---------------------------|-------------|--------------------------|
|               | SSI-10    | SSI-10 F    | GGTATTTTCAGGGCACAAGC      | SSI-10 R    | GCACTGGAGGCTCTTCTCTATG   |
|               | SSI-11    | SSI-11 F    | GTTAGCAGGCACAGGCACTC      | SSI-11 R    | TGATTGATACACCCCCATTCC    |
| <i>AGPlar</i> | AGPlar-1  | AGPlar-1F   | CAAGGACAGGAAACACACATCG    | AGPlar-1R   | GACAGAAATGATGAAACGAAGC   |
|               | AGPlar-2  | AGPlar-2 F  | GAGCCTGTTTCTTGATGTTTGC    | AGPlar-2 R  | CCAAGACACATCCTCCTCACTG   |
|               | AGPlar-3  | AGPlar-3 F  | GTGAGCCCAATAAGGAGAGG      | AGPlar-3 R  | CACCAAGTCAACAACCACGC     |
|               | AGPlar-4  | AGPlar-4 F  | TGGTGGTGGAAATCAACTTTACTG  | AGPlar-4 R  | CCAAACAGGTGAAAGGAAATC    |
|               | AGPlar-5  | AGPlar-5 F  | CTTATTGCAGTAGTATGGTTTCTCC | AGPlar-5 R  | TGTGGTTCAAGCCTTCAGGTC    |
|               | AGPlar-6  | AGPlar-6 F  | CAAGACTACTGTCAGAAGGCAAGG  | AGPlar-6 R  | GCAGCGAAACAGAAAATGGAG    |
| <i>SSII-1</i> | SSII-1 1  | SSII-1 1F   | GAAGAGAAAGGCACGACGAC      | SSII-1 1R   | GAGAGTTAGATCAGATGGTCATCG |
|               | SSII-1 2  | SSII-1 2 F  | GTCTCCAACCTTGACTGCCATC    | SSII-1 2 R  | CCAATCAACGAACATCCACG     |
|               | SSII-1 3  | SSII-1 3 F  | GACTCCACCACCTTCTCCTCC     | SSII-1 3 R  | CAACAACGCATAGACACCTGC    |
|               | SSII-1 4  | SSII-1 4 F  | ATCATCCACGGTGAGCCATC      | SSII-1 4 R  | ATTCAAGGTCGTTTCGCAGG     |
|               | SSII-1 5  | SSII-1 5 F  | CTTGCTGGAATGTGAAATGTTAC   | SSII-1 5 R  | GCTCTTCTACAACAGGCAGGA    |
|               | SSII-1 6  | SSII-1 6 F  | ACCTATGTCCTGATGAAGCCTC    | SSII-1 6 R  | GAGAGATGAATGCGACTGGTG    |
|               | SSII-1 7  | SSII-1 7 F  | GAGGGAGGCAATGGTGGTG       | SSII-1 7 R  | CTGGTATCTCCTTGGCTCTCC    |
|               | SSII-1 8  | SSII-1 8 F  | TGGTGGTTACATTTGTAGAAGTGC  | SSII-1 8 R  | CATCACCGTAGCAGTAGCCAC    |
|               | SSII-1 9  | SSII-1 9F   | TGGTTAGCCCTGTTTCTCTGTC    | SSII-1 9 R  | GAAAGCAATGACAGGAACATCG   |
|               | SSII-1 10 | SSII-1 10 F | TCAGGCAGGTAAACAGCAATG     | SSII-1 10 R | GTATCAATGTCAATGTCATCTGGG |
|               | SSII-1 11 | SSII-1 11 F | CCCTGGGTAGGTTGTTGAGC      | SSII-1 11 R | CCAGGAAACCGTGAGACGA      |
| <i>SSII-2</i> | SSII-2 1  | SSII-2 1F   | GAACCTTAGCCCTCAAACAACCTC  | SSII-2 1R   | TGTAAATCCACCCAGCCAGTC    |
|               | SSII-2 2  | SSII-2 2F   | ATCCTGTTGGTGTGGCTGC       | SSII-2 2R   | CCATACAAGTGCCACCAAACC    |
|               | SSII-2 3  | SSII-2 3F   | GCTGGCTCCTCCTCCTCTTC      | SSII-2 3R   | CACAACATCTCCAAGACCACC    |
|               | SSII-2 4  | SSII-2 4F   | CACTGGACAAGAAGGAAGACG     | SSII-2 4R   | GCTTCAAACATCCTGCCATC     |
|               | SSII-2 5  | SSII-2 5F   | CGATGGTGTGATTTTGTGTTTC    | SSII-2 5R   | GATTGAATTACATTGCGAAACG   |
|               | SSII-2 6  | SSII-2 6F   | TATGACACCAGTTTTGTTCTTACG  | SSII-2 6R   | GGTACGTGTTGAGGCAGTGC     |
|               | SSII-2 7  | SSII-2 7F   | CGTCCTCCTGATGCCGTC        | SSII-2 7R   | ATTGTGGTCAGGCTCAGGC      |

|                |            |             |                             |             |                                |
|----------------|------------|-------------|-----------------------------|-------------|--------------------------------|
| <i>SSIII-1</i> | SSIII-1 1  | SSIII-1 1F  | ACAGTTTGTGTTTCCTGAGTTACG    | SSIII-1 1R  | GAGAGCCGTGTATGCCTTCG           |
|                | SSIII-1 2  | SSIII-1 2F  | GGTGA CTGCTTGAAACTGGG       | SSIII-1 2R  | CCTTGTCC TTGTAAATCTCCTGC       |
|                | SSIII-1 3  | SSIII-1 3F  | GGATTGTGCGGTTCTGCTTC        | SSIII-1 3R  | AACAAAACACTTATTCCCAGCC         |
|                | SSIII-1 4  | SSIII-1 4F  | GTTCTGTTTGCTGATGATGACC      | SSIII-1 4R  | ACCCAGTCTAACACCAATGCC          |
|                | SSIII-1 5  | SSIII-1 5F  | TATGACTTGAAGACACCTACTGATG   | SSIII-1 5R  | CTTCATTTTCTTGTGTGGCTCC         |
|                | SSIII-1 6  | SSIII-1 6F  | CTAATCCCACTTGT TTTTCACCG    | SSIII-1 6R  | CAGCGATGTT CACACTCTCACC        |
|                | SSIII-1 7  | SSIII-1 7F  | CAAATCAACTGTAAGTGCTGGAG     | SSIII-1 7R  | CAGAATGACAGCACTTGTGTATGA<br>G  |
|                | SSIII-1 8  | SSIII-1 8F  | ATGCCATTTTCTCCGTTCTC        | SSIII-1 8R  | CAGTGTGGCATCTATGAGCAAG         |
|                | SSIII-1 9  | SSIII-1 9F  | CTTGGACTACAGCAA CTGATAACC   | SSIII-1 9R  | CTCACAACCGCAGGATAACG           |
| <i>SSIII-2</i> | SSIII-2 1  | SSIII-2 1F  | GAGCAGGCTGAAGGTCGTC         | SSIII-2 1R  | CGTATGAAGGGAAATCGTCC           |
|                | SSIII-2 2  | SSIII-2 2F  | CAAGTTCAGGTTTGTGTAGGATAGC   | SSIII-2 2R  | GCTTCATCCACCACATCCAC           |
|                | SSIII-2 3  | SSIII-2 3F  | CTTCAAGCACTGTAATGTATGGG     | SSIII-2 3R  | GACTGGCTTTTCCCTATGGACAC        |
|                | SSIII-2 4  | SSIII-2 4F  | CCAGCGTTTATCAACAAGAAGG      | SSIII-2 4R  | GACTAAACGACCATTGAAGAACAC       |
|                | SSIII-2 5  | SSIII-2 5F  | TGTCCACATCAAAGGAGCATTC      | SSIII-2 5R  | AGCCAACAAAATACATCAGAACC        |
|                | SSIII-2 6  | SSIII-2 6F  | ATCAGAGAACGGGAGGAAGC        | SSIII-2 6R  | CTCCAGTTACAGAATTGTCGTAGC       |
|                | SSIII-2 7  | SSIII-2 7F  | CAAGCACTGTTGAAGTATATGTCTAGC | SSIII-2 7R  | CTAACTGAGAAAGGAAGGACAAC<br>AC  |
|                | SSIII-2 8  | SSIII-2 8F  | GTTTCTGTGGTGGTTTTGTGCG      | SSIII-2 8R  | GCAAAACACATTACATGGATTCTC       |
|                | SSIII-2 9  | SSIII-2 9F  | CTTTCTTTGTTTCCATGTTTTGCG    | SSIII-2 9R  | AAGAGGAGTAAAGTGAATGTAAG<br>GTG |
|                | SSIII-2 10 | SSIII-2 10F | GTTCTTGTTTTCCATGCTTGC       | SSIII-2 10R | AACCACCTAAAAAGCAAACACATC       |
|                | SSIII-2 11 | SSIII-2 11F | ACTTGAACGCAATGGACAGG        | SSIII-2 11R | GCAGAGGGAGTGGAAACCAAC          |
|                | SSIII-2 12 | SSIII-2 12F | GCTTGGTGGTCTATTGTTTATGTG    | SSIII-2 12R | GGCTTTAGGAATCGTGATGG           |
| <i>SSIV-1</i>  | SSIV-1 1   | SSIV-1 1F   | AGTTGAGGAGGCAGTGGGAG        | SSIV-1 1R   | GGATGCTTTCACGGTTTCAC           |
|                | SSIV-1 2   | SSIV-1 2 F  | CGATGGACGAAAATCACACG        | SSIV-1 2 R  | CAGATTGGTCAGGCACTCACC          |
|                | SSIV-1 3   | SSIV-1 3 F  | GCTCTCCTGTCCCTCTCATGTG      | SSIV-1 3 R  | GTTTGAAGGAGGTGTGGAAGTG         |
|                | SSIV-1 4   | SSIV-1 4 F  | TACTGCCTTACTGGGGTGGTC       | SSIV-1 4 R  | TCTAACAGTGACCTTTCTTTCTCC       |

|               |           |             |                           |             |                                |
|---------------|-----------|-------------|---------------------------|-------------|--------------------------------|
|               | SSIV-1 5  | SSIV-1 5 F  | CAACCAAAGGGAACATAAATACAG  | SSIV-1 5 R  | AAGGTCCGTGTGTTGTAATGG          |
|               | SSIV-1 6  | SSIV-1 6 F  | GTGGTGTCCAAATCTGCCTC      | SSIV-1 6 R  | GTCAAACAATACAGCACACTAATC<br>C  |
|               | SSIV-1 7  | SSIV-1 7 F  | GTGCCACATTGCCTGCTTAG      | SSIV-1 7 R  | CAGTCGTATTTGGGAAGAACAATC       |
|               | SSIV-1 8  | SSIV-1 8 F  | CTGCTTGGATTTGAAGTATTGC    | SSIV-1 8 R  | CACCCTGAAACCAATAAGAAGC         |
|               | SSIV-1 9  | SSIV-1 9 F  | CTTGATGTTGAGCAGTTGGATAG   | SSIV-1 9 R  | GTGTAGGAGGCTTTGGTCTCTC         |
|               | SSIV-1 10 | SSIV-1 10 F | TAGGGCTGTATTCTGAGGATGC    | SSIV-1 10 R | TGGCAAATCAAGAACTCATAGG         |
|               | SSIV-1 11 | SSIV-1 11 F | CAAAAGGGTCTACATCTTATCAGG  | SSIV-1 11 R | CCATAGGTTTTCTGCTGTAGTAGC       |
|               | SSIV-1 12 | SSIV-1 12 F | CTGGTGGATTGTGTGATAGGTG    | SSIV-1 12 R | CTTAGCCACCCATTCTTCTCAC         |
| <i>SSIV-2</i> | SSIV-2 1  | SSIV-2 1F   | CTTCCCCAGCCTCCGCATC       | SSIV-2 1R   | CATTTTTCTGTGAAGATAGCCTGC       |
|               | SSIV-2 2  | SSIV-2 2 F  | GTATGTGGTGTAGATTGAAGTCCC  | SSIV-2 2 R  | GATTGCGTCCCAGAACCATAG          |
|               | SSIV-2 3  | SSIV-2 3 F  | CTCTTTTAGATGCTTCGCTTAGG   | SSIV-2 3 R  | CCAAACCACCAACCTAAAGAATC        |
|               | SSIV-2 4  | SSIV-2 4 F  | GCTGATTAGATGTGAACTACTGATG | SSIV-2 4 R  | GCATCCTGTCTTCCCTATCAAG         |
|               | SSIV-2 5  | SSIV-2 5 F  | GCAAATCTGGGCTTCAACTC      | SSIV-2 5 R  | CCACCCTGAGCACCAGAAG            |
|               | SSIV-2 6  | SSIV-2 6 F  | GTCTTGCCGACCATCTAACG      | SSIV-2 6 R  | CAATGACTTCTAACCGTGCTGC         |
|               | SSIV-2 7  | SSIV-2 7 F  | GACGCTCTATTGATTTGCTGAC    | SSIV-2 7 R  | CAATACCCTCAAACCTCTCTCTGC       |
|               | SSIV-2 8  | SSIV-2 8 F  | GTTGCTCTTGCTCCTTTTGTG     | SSIV-2 8 R  | CAGGCTTTCTATTGTAGTAGTTGAA<br>C |
|               | SSIV-2 9  | SSIV-2 9F   | CTGATGAAAAGGTGGATGTGC     | SSIV-2 9 R  | TCACTGGGACACGACAATGG           |
| <i>PUL</i>    | PUL-1     | PUL-1 F     | GAGAAAGAAGTGGAGACAAGGAC   | PUL-1 R     | CAAAGAAGAAAGTGATTAGAGGAT<br>G  |
|               | PUL-2     | PUL-2 F     | GAGTGTCTTATCTGCCGTCG      | PUL-2 R     | CAATACCAGAAGAACCCCAAGG         |
|               | PUL-3     | PUL-3 F     | GAATCCAAACCTCTCAAATGC     | PUL-3 R     | CATCGTGGCATCTCTGCTTG           |
|               | PUL-4     | PUL-4 F     | TGTTTCATCTTCAGGGGTTTCG    | PUL-4 R     | CAACCAACCAAGTCCGTGTG           |
|               | PUL-5     | PUL-5 F     | CCTATGCCAGAGGGTATGTGTG    | PUL-5 R     | GCTTGTTGCTCATCTGAACCTG         |
|               | PUL-6     | PUL-6 F     | GTGAAAGGTTCTTGTTTGGTTGG   | PUL-6 R     | CTCACCTTTATTCTGGCTCTAATC       |
|               | PUL-7     | PUL-7 F     | CGTCCCTACAACACCACATCT     | PUL-7 R     | CGATGATTGATGGGCGTTC            |
|               | PUL-8     | PUL-8 F     | CTTGTCGTAGGTTGATGGGTTTC   | PUL-8 R     | GAAACGGAGGGAGTAACACACTG        |

|             |         |           |                           |           |                                |
|-------------|---------|-----------|---------------------------|-----------|--------------------------------|
|             | PUL-9   | PUL-9 F   | TACACCATCCTCACTACCAGACTC  | PUL-9 R   | TGGCAGATGTAATAGTGTGTCAGAGC     |
|             | PUL-10  | PUL-10 F  | CCAACTCATCGTGTGCTGTG      | PUL-10 R  | CCATTCCTGTTCTATTACATCAAC<br>G  |
|             | PUL-11  | PUL-11 F  | GTTTTGCTTTTGTGGGTGTCC     | PUL-11 R  | TGTAGCAAGTTCACGCCTGG           |
|             | PUL-12  | PUL-12 F  | GGAAGGTGGAATAGACAGAACG    | PUL-12 R  | ATGTGCGATTACTTCAAGAATGG        |
|             | PUL-13  | PUL-13 F  | CTACAGTGCTAATGTGCTATGCC   | PUL-13 R  | CACCAACAATCAAAGAAAACATAG<br>AG |
|             | PUL-14  | PUL-14 F  | GTGATTTACCTTTTGTGCTGCTTAC | PUL-14 R  | TTCTTCATTCTTATCTCTTGGAGG       |
|             | PUL-15  | PUL-15 F  | CTGCCCTCTTGACCTTGATG      | PUL-15 R  | ATGTTCCAGTATGATTGTTTGCC        |
|             | PUL-16  | PUL-16 F  | GCATTATGGTAGACAGGGAGC     | PUL-16 R  | TAGCCCAGTCTCTTCATATTCTTC       |
| <i>SBE4</i> | SBE4-1  | SBE4-1 F  | TACTGCCGTTTCCTTTCTATGG    | SBE4-1 R  | CGAGACAGAGAGTTGAGGTGGA         |
|             | SBE4-2  | SBE4-2 F  | GATGCTCCGAAGTCAGAACAC     | SBE4-2 R  | AGAAGAAGAAGAGGAGCAAGAGT<br>A   |
|             | SBE4-3  | SBE4-3 F  | AGAGAAAGGAGCCACAACAC      | SBE4-3 R  | CAGCGATTTGTAACACTAACTCAT<br>C  |
|             | SBE4-4  | SBE4-4 F  | CGTTATTCCCTCCATTTTACTG    | SBE4-4 R  | GTAGTCAAGATGGTTCGAAATC         |
|             | SBE4-5  | SBE4-5 F  | GCATAAAGGTTGTGGCTGAAGA    | SBE4-5 R  | GTGACCACTGCCAAATCACG           |
|             | SBE4-6  | SBE4-6 F  | ATGAAGGTGGCTTGGATGC       | SBE4-6 R  | CGTGAGCCATGAGGAATAGC           |
|             | SBE4-7  | SBE4-7 F  | GGTGAAATGAATGGATGGCTA     | SBE4-7 R  | GGTCGTTTAGGTTGAGGATGTT         |
|             | SBE4-8  | SBE4-8 F  | GATACACCATCTGGCGTAAAGG    | SBE4-8 R  | ATGTGTTTATCTTCGGTTCCTGTA       |
|             | SBE4-9  | SBE4-9 F  | TTGTGAAACGGAGGAAGTATGAT   | SBE4-9 R  | CCATAGTTGAACAGGCGAGAA          |
|             | SBE4-10 | SBE4-10 F | TCGGAACCTATTGTACTTGGACT   | SBE4-10 R | TGCCTGTAGTTCTTCCAATGC          |
|             | SBE4-11 | SBE4-11 F | ATGACTCCTGCTGCTGATACTTG   | SBE4-11 R | ACACACTTCTCTGACCACCTTCTA       |
|             | SBE4-12 | SBE4-12 F | GCTGGAACTTCGGTGATTGT      | SBE4-12 R | CGAGGTGTTGAAGGTCTGTCT          |
|             | SBE4-13 | SBE4-13 F | GGATTGTTGAGACTTGGAACATAC  | SBE4-13 R | TGGGTGTCATTTGCTGGGA            |
|             | SBE4-14 | SBE4-14 F | CCTTCATTGGTCAGGGAGAT      | SBE4-14 R | GTCCTATCAACTACACCGTCCAG        |
|             | SBE4-15 | SBE4-15 F | GCAAACACGAGGAGGATAAGG     | SBE4-15 R | TGGTCTATTTCTTCACGAGTCA         |
|             | SBE4-16 | SBE4-16 F | CAAGGGAGTTGGTGGTAATGAC    | SBE4-16 R | TGTGATTGGTTGAGAAGTGGAG         |

|               |          |           |                          |           |                          |
|---------------|----------|-----------|--------------------------|-----------|--------------------------|
|               | SBE4-17  | SBE4-17 F | CGCTCTTAGTTTTCTGCCA      | SBE4-17R  | GTCGTGGCTCTTGGCTCTC      |
| <i>GBSSII</i> | GBSSII-1 | GBSSII-1F | GCAGCACAGAGAGGACTTTG     | GBSSII-1R | CTTTGGTGGTGTCTTTCAGTG    |
|               | GBSSII-2 | GBSSII-2F | TCCAGCCAAAAGAAGATGTGA    | GBSSII-2R | CATTTGTTTGGTAAGAGCAGTAGG |
|               | GBSSII-3 | GBSSII-3F | CTTGGATTAGATGAGCACACTGT  | GBSSII-3R | CATCACTCAATTAGAACGCAGGT  |
|               | GBSSII-4 | GBSSII-4F | GGTGACAGGACAGAAACAGTGC   | GBSSII-4R | CTCTGGCAAATCTACCCTGG     |
|               | GBSSII-5 | GBSSII-5F | AGGAATGTATGTGAATGCTAAGGT | GBSSII-5R | CCCTCTAGCGTTGTTTGGATA    |
|               | GBSSII-6 | GBSSII-6F | GCAGCCATTCCAGAGTTCGT     | GBSSII-6R | GCAGCAATAATCAGGTAGAATGA  |
|               | GBSSII-7 | GBSSII-7F | CGAGGTAAGGAGCAGTGTGTT    | GBSSII-7R | CTGCTGCTTTCTCGGTGCT      |

---
